# 1 **Identification of Interleukin1 $\beta$ as an Amplifier of Interferon alpha-induced Antiviral** 2 **Responses**

3 Short Title: IL1 $\beta$  enhances IFN $\alpha$ -induced responses

4  
5 Katharina Robichon<sup>1†</sup>, Tim Maiwald<sup>2†</sup>, Marcel Schilling<sup>1†</sup>, Annette Schneider<sup>1</sup>, Joschka  
6 Willemsen<sup>3</sup>, Florian Salopiata<sup>1</sup>, Melissa Teusel<sup>1</sup>, Salopiata<sup>2</sup>, Clemens Kreutz<sup>2,4</sup>, Christian  
7 Ehltling<sup>5</sup>, Jun Huang<sup>6</sup>, Sajib Chakraborty<sup>1,7</sup>, Xiaoyun Huang<sup>1</sup>, Georg Damm<sup>8</sup>, Daniel  
8 Seehofer<sup>8</sup>, Philipp A. Lang<sup>6</sup>, Johannes G. Bode<sup>5</sup>, Marco Binder<sup>3</sup>, Ralf Bartenschlager<sup>9</sup>,  
9 Jens Timmer<sup>2‡\*</sup>, Ursula Klingmüller<sup>1‡\*</sup>

10  
11 <sup>1</sup> Division Systems Biology of Signal Transduction, German Cancer Research Center  
12 (DKFZ), INF 280, Heidelberg, Germany

13 <sup>2</sup> Institute for Physics, University of Freiburg, Germany & Signalling Research Centres  
14 BIOS and CIBSS, University of Freiburg, Freiburg, Germany

15 <sup>3</sup> Research Group "Dynamics of Early Viral Infection and the Innate Antiviral Response",  
16 Division Virus-Associated Carcinogenesis, German Cancer Research Center (DKFZ), INF  
17 280, Heidelberg, Germany

18 <sup>4</sup> Institute of Medical Biometry and Statistics, Faculty of Medicine and Medical Center,  
19 University of Freiburg, Freiburg, Germany.

20 <sup>5</sup> Department of Gastroenterology, Hepatology and Infectious Diseases, University  
21 Hospital, Medical Faculty, Heinrich-Heine-University of Düsseldorf, Germany

22 <sup>6</sup> Department of Molecular Medicine II, University Hospital, Medical Faculty, Heinrich-  
23 Heine-University of Düsseldorf, Germany

24 <sup>7</sup> Department of Biochemistry and Molecular Biology, University of Dhaka, Dhaka-1000,  
25 Bangladesh

26 <sup>8</sup> Department of Hepatobiliary Surgery and Visceral Transplantation, University of Leipzig,  
27 Leipzig, Germany and Department of General-, Visceral- and Transplantation Surgery,  
28 Charité University Medicine Berlin, Berlin, Germany

29 <sup>9</sup> Department of Infectious Diseases, Molecular Virology, University of Heidelberg, INF  
30 345, Heidelberg, Germany

31 \* Contact Information: [jети@fdm.uni-freiburg.de](mailto:jeti@fdm.uni-freiburg.de) (J.T.) u.[Klingmueller@dkfz.de](mailto:Klingmueller@dkfz.de) (U.K., lead  
32 contact)

33 † These authors contributed equally

34 ‡ Joint last authors

35

## 36 **Abstract**

37 The induction of an interferon-mediated response is the first line of defense against  
38 pathogens such as viruses. Yet, the dynamics and extent of interferon alpha (IFN $\alpha$ )-  
39 induced antiviral genes vary remarkably and comprise three expression clusters: early,  
40 intermediate and late. By mathematical modeling based on time-resolved quantitative  
41 data, we identified mRNA stability as well as a negative regulatory loop as key  
42 mechanisms endogenously controlling the expression dynamics of IFN $\alpha$ -induced antiviral  
43 genes in hepatocytes. Guided by the mathematical model, we uncovered that this  
44 regulatory loop is mediated by the transcription factor IRF2 and showed that knock-down  
45 of IRF2 results in enhanced expression of early, intermediate and late IFN $\alpha$ -induced  
46 antiviral genes. Co-stimulation experiments with different pro-inflammatory cytokines  
47 revealed that this amplified expression dynamics of the early, intermediate and late IFN $\alpha$ -  
48 induced antiviral genes can be mimicked by co-application of IFN $\alpha$  and interleukin1 beta  
49 (IL1 $\beta$ ). Consistently, we found that IL1 $\beta$  enhances IFN $\alpha$ -mediated repression of viral  
50 replication. Conversely, we observed that in IL1 $\beta$  receptor knock-out mice replication of  
51 viruses sensitive to IFN is increased. Thus, IL1 $\beta$  is capable to potentiate IFN $\alpha$ -induced  
52 antiviral responses and could be exploited to improve antiviral therapies.

53

## 54 **Author Summary**

55 Innate immune responses contribute to the control of viral infections and the induction of  
56 interferon alpha (IFN $\alpha$ )-mediated antiviral responses is an important component.  
57 However, IFN $\alpha$  induces a multitude of antiviral response genes and the expression  
58 dynamics of these genes can be classified as early, intermediate and late. Here we show,  
59 based on a mathematical modeling approach, that mRNA stability as well as the negative  
60 regulator IRF2 control the expression dynamics of IFN $\alpha$ -induced antiviral genes. Knock-  
61 down of IRF2 resulted in the amplified IFN $\alpha$ -mediated induction of the antiviral genes and  
62 this amplified expression of antiviral genes could be mimicked by co-stimulation with IFN $\alpha$   
63 and IL1 $\beta$ . We observed that co-stimulation with IFN $\alpha$  and IL1 $\beta$  enhanced the repression  
64 of virus replication and that knock-out of the IL1 receptor in mice resulted in increased

65 replication of a virus sensitive to IFN $\alpha$ . In sum, our studies identified IL1 $\beta$  as an important  
66 amplifier of IFN $\alpha$ -induced antiviral responses.

67

## 68 **Introduction**

69 Cytokines such as interferons (IFNs) are important regulators of the innate immune  
70 system, the first line of defense against microbial infection. IFNs induce in a highly  
71 dynamic process the expression of several classes of IFN-stimulated genes. The encoded  
72 proteins of these genes fulfill a variety of tasks including the clearance of viruses. To  
73 ensure effectiveness of the response and to prevent damage, the process has to be tightly  
74 controlled, which is achieved through several positive and negative feedback loops [1].  
75 Due to the non-linearity of the underlying reactions the impact of alterations on a potential  
76 outcome is difficult to predict. IFNs such as interferon alpha (IFN $\alpha$ ) are widely applied  
77 therapeutic agents and therefore strategies to strengthen IFN-induced responses are of  
78 major interest. However, this requires a more quantitative understanding of the  
79 interrelations between the IFN signaling pathway components and the expression of IFN-  
80 stimulated genes (ISGs) as well as insights into mechanisms shaping the response to  
81 IFNs.

82 A well-studied IFN-induced response is the antiviral response elicited for example by  
83 major hepatotropic RNA viruses such as the human pathogen hepatitis C virus (HCV) and  
84 the murine pathogen lymphocytic choriomeningitis virus (LCMV). Upon infection, the viral  
85 RNA is sensed by specific cellular pattern recognition receptors (PRR) that trigger the  
86 expression of interferons (IFNs) and induce expression of antiviral genes as first line of  
87 defense [2]. However, viruses can evade the antiviral response by antagonizing the  
88 induction of the effector pathways of the IFN system and establish a persistent infection.  
89 Therefore, it would be highly beneficial to identify mechanisms to enhance the IFN-  
90 induced antiviral response to reduce virus spread and improve viral clearance.

91 The major signal transduction pathway activated in response to type I IFNs such as IFN $\alpha$   
92 is the JAK/STAT pathway [3]. Regulation of the dynamics of the JAK/STAT pathway  
93 activation and the expression of IFN-stimulated genes are important to mount an effective  
94 IFN response and to maintain cellular homeostasis. The IFN $\alpha$ -induced signaling pathway  
95 comprises complex negative feedback loops consisting of suppressor of cytokine  
96 signaling 1 (SOCS1) and ubiquitin-specific peptidase 18 (USP18) that jointly determine

97 signal attenuation. In contrast, interferon regulatory factor 9 (IRF9) acts as a positive  
98 regulator of IFN $\alpha$  signaling. By dynamic pathway modeling it was shown that an  
99 upregulation of IRF9 can enhance the expression of ISGs [4]. Further, it was shown that  
100 the extent and duration of the expression of antiviral genes positively correlates with a  
101 reduced virus load [5] and the specific expression profiles of antiviral genes appear to be  
102 critical for shifting the balance from viral persistence to viral clearance. Therefore, the  
103 modulation of feedback loops might be harnessed to increase and prolong the duration of  
104 the IFN response and thereby contribute to improved viral clearance.

105 IFN $\alpha$  was not only shown to activate the classical JAK-STAT1 pathway, but recent  
106 publications have also reported an activation of STAT3 after IFN $\alpha$  treatment [6]. For  
107 example, Su et al. showed a phosphorylation of STAT3 after IFN $\alpha$  treatment in RAMOS  
108 cells [7] and IFN $\alpha$  treatment led to an increase of STAT3 phosphorylation in primary  
109 healthy dendritic cells [8] as well as B cells [9]. The activation of the different STAT  
110 molecules may promote the formation of different hetero- and homodimer pairs, resulting  
111 in different expression of the ISGs.

112 In addition to type I IFNs, pro-inflammatory cytokines such as interleukin 6 (IL6),  
113 interleukin-1beta (IL1 $\beta$ ) and IFN gamma (IFN $\gamma$ ) [10] can contribute to the activation of an  
114 anti-microbial response. Binding of IL1 $\beta$  to the type I IL1 receptor (IL1R1) that is expressed  
115 on different cell types including hepatocytes results in the activation of different  
116 downstream signaling pathways. While the main pathways activated by IL1 $\beta$  are p38 and  
117 NF $\kappa$ B [11], there is evidence that IL1 $\beta$  can also activate STAT3 [12]. IL1 $\beta$  was reported to  
118 induce the protein-protein interaction between STAT3 and NF $\kappa$ B in hepatocytes as well  
119 as DNA binding of this complex [13], which might be involved in facilitating the recently  
120 reported NF $\kappa$ B-assisted DNA loading of STAT3 during the acute phase response [14]. An  
121 interplay between IFN $\alpha$  and IL1 $\beta$  has been observed previously. On the one hand, in liver  
122 samples of chronic hepatitis C patients elevated levels of IFN $\beta$  and IL1 $\beta$  were observed  
123 [15]. On the other hand, it was reported that IFN $\alpha$  and IFN $\beta$  suppress IL1 $\beta$  maturation in  
124 bone marrow-derived macrophages [16] and that IL1 $\beta$  limits excessive type I IFN  
125 production through the induction of eicosanoids [17]. Co-treatment with IFN $\alpha$  and IL1 $\beta$   
126 resulted in higher and more sustained STAT1 phosphorylation in Huh7 cells [18]. Thus,  
127 the physiological relevance and the underlying mechanism of a potential cross-talk  
128 between type I IFN-induced signaling and IL1 $\beta$  remains unknown.

129 Here we employ a systems biology approach that combines time-resolved quantitative  
130 experimental data and mathematical modeling. We show that mRNA stability as well as  
131 IRF2 as a negative feedback loop critically shape the distinct expression dynamics of the  
132 early, intermediate and late IFN $\alpha$ -induced genes. Importantly, we uncover that IL1 $\beta$  is  
133 capable to mimic the impact of knockdown of IRF2 and boosts the IFN $\alpha$ -induced antiviral  
134 gene response.

135

## 136 **Results**

### 137 **Distinct dynamics of IFN $\alpha$ -induced gene expression**

138 To characterize the temporal response induced by IFN $\alpha$  stimulation and to classify the  
139 induced genes based on their expression dynamics, we took advantage of our previously  
140 reported microarray analysis monitoring IFN $\alpha$ -induced gene expression over 24 hours in  
141 the human hepatoma cell line Huh7.5 stimulated with IFN $\alpha$  [4]. We used Huh7.5 cells as  
142 a model system, because this cell line has been widely used to investigate the replication  
143 of hepatotropic viruses. Utilizing these data, we focused our analysis on genes that  
144 exhibited significant upregulation ( $p < 0.05$  and average fold-change  $> 2$ ) in response to  
145 IFN $\alpha$  treatment (Fig 1A). Sorting the 53 significantly upregulated genes by the time point  
146 of maximal induction revealed three expression clusters: early, intermediate and late (Fig  
147 1B). 21 genes classified as early were rapidly induced with a peak of maximal activation  
148 (vertical red line) one to four hours after stimulation and rapidly declined thereafter. 27  
149 genes grouped in the intermediate cluster reached their maximal expression at six to eight  
150 hours, followed by a moderate decline. Five genes were induced late and exhibited  
151 persistent upregulation with maximal expression at 12 hours or later.

152 As representatives for further analysis we selected two IFN $\alpha$ -induced genes with known  
153 antiviral activity from each group [19, 20]: IFN regulatory factor 1 (*IRF1*) and tripartite  
154 motif containing 21 (*TRIM21*) from the early group, MX dynamin-like GTPase 1 (*MX1*) and  
155 eukaryotic translation initiation factor 2- $\alpha$  kinase 2 (*EIF2AK2/PKR*) from the  
156 intermediate group, and IFN $\alpha$ -inducible protein 6 (*IFI6*) and IFN-induced transmembrane  
157 protein 3 (*IFITM3*) as examples from the late group. The characteristic dynamics of the  
158 IFN $\alpha$ -induced expression levels of each of the selected antiviral genes were verified by  
159 qRT-PCR analysis and confirmed the grouping into the early, intermediate and late cluster  
160 (Fig 1C).

161 To interrogate whether this dynamic behavior of IFN $\alpha$ -induced antiviral genes is  
162 characteristic for Huh7.5 cells and hence potentially determined by the cancer cell context  
163 or whether it is conserved in primary hepatocytes, we examined the IFN $\alpha$ -induced  
164 expression of the selected IFN $\alpha$ -induced antiviral genes in primary human hepatocytes  
165 isolated from multiple donors. Overall the observed fold change of the expression of the  
166 IFN $\alpha$ -induced antiviral genes was lower in primary human hepatocytes compared to  
167 Huh7.5 cells. But in line with our previous results, the anticipated dynamic behavior was  
168 observed for each of the genes tested: The early genes *IRF1* and *TRIM21* showed  
169 maximal expression between 1 and 4 hours after IFN $\alpha$  treatment and rapidly declined  
170 thereafter, the intermediate genes *MX1* and *EIF2AK2* showed maximal expression  
171 between six to eight hours and rather sustained expression and the late genes *IFI6* and  
172 *IFITM3* exhibited a persistent increase for the entire observation time of up to 24 hours  
173 (Fig 1D). The conserved dynamic behavior of IFN $\alpha$ -induced antiviral genes in Huh7.5 cells  
174 and primary human hepatocytes suggested that the expression dynamics of IFN $\alpha$ -induced  
175 antiviral genes is regulated by robust mechanisms maintained in hepatocytes.

176

### 177 **Distinct mRNA stability affects expression profiles of IFN $\alpha$ -induced genes**

178 To elucidate key mechanisms that contribute to the three distinct expression profiles of  
179 the IFN $\alpha$ -induced antiviral genes, we first tested whether the IFN $\alpha$  dose-dependency  
180 differed between these groups. Comparing the half-maximal effective IFN $\alpha$  dose ( $EC_{50}$ )  
181 of the selected IFN $\alpha$ -induced antiviral genes however showed that the  $EC_{50}$  of these  
182 genes ranged from  $100 \pm 9$  to  $171 \pm 23$  U/ml IFN $\alpha$  and did not reveal substantial  
183 differences between the three groups (Fig 2A). Therefore, we next assessed whether the  
184 distinct expression dynamics resulted from differences in the stability of the mRNAs. To  
185 determine the mRNA half-lives of the selected IFN $\alpha$ -induced genes, we inhibited *de novo*  
186 transcription using actinomycin D. As shown in Fig 2B, the mRNA concentration of each  
187 of the examined antiviral genes decreased over time. To calculate the half-lives of the  
188 different mRNAs, a three-parameter exponential-decay regression was performed with  
189 the mRNA expression data. Interestingly, the mRNA expression profiles of the selected  
190 genes representing the three groups were well reflected by their mRNA half-lives (Fig 2B):  
191 mRNAs that exhibited an early-type expression profile displayed a short half-life of 30  
192 minutes to 2 hours; intermediate-type mRNA expression showed a half-life of

193 approximately 5 to 7 hours; and genes with sustained-type expression profiles exhibited  
194 stable mRNAs over the entire observation period.

195 Thus, the three expression groups of IFN $\alpha$ -induced antiviral genes did not differ in their  
196 IFN $\alpha$  dose dependency, but were characterized by differences in mRNA stability.  
197 However, the distinct mRNA stabilities of the three groups did not explain e.g. the  
198 observed differences in the time to maximal expression of the antiviral genes. Therefore,  
199 we concluded that additional mechanisms such as feedback loops shape the expression  
200 profiles of IFN $\alpha$ -induced antiviral genes.

201  
202 **Analysis of the pathway structure using a dynamic model of IFN $\alpha$ -induced signaling**

203 To elucidate the potential impact of feedback loops regulating the dynamic properties of  
204 the expression of IFN $\alpha$ -induced antiviral genes, an ordinary differential equation (ODE)  
205 model (core model) was developed (S1A Fig). The core model was based on our  
206 previously published mathematical model [4] that was expanded by introducing mRNA  
207 expression of the negative regulators SOCS1 and USP18 and the selected IFN $\alpha$ -induced  
208 antiviral genes. The mathematical model was calibrated based on previously published  
209 [4] and new experimental data on the activation of the JAK/STAT pathway and IFN $\alpha$ -  
210 induced expression of antiviral genes that were acquired for up to 24 hours post IFN $\alpha$   
211 stimulation. The initial concentrations of the main pathway components were  
212 experimentally determined (S1 Table). In addition, the experimentally determined mRNA  
213 half-life values were incorporated by introducing an mRNA-specific degradation  
214 parameter for each individual mRNA.

215 The simulations of the core model for the IFN $\alpha$ -induced signaling components  
216 (exemplarily shown for phosphorylation of JAK1 and STAT1), for the induction of the  
217 positive regulator IRF9 and for the negative regulator USP18 were consistent with the  
218 experimental data (S1B Fig). However, the trajectories of the core model were not able to  
219 reproduce the induction kinetics of the early (*IRF1* and *TRIM21*, S1C Fig) and late genes  
220 (*IFI6*, S1C Fig) as well as of the negative regulatory signaling protein SOCS1 (S1B Fig).  
221 Further, the core model failed to sufficiently reproduce the downregulation of the  
222 intermediate genes *MX1* and *EIF2AK2* indicating a missing interaction (S1C Fig). Thus,  
223 we aimed to identify missing components in our mathematical model.

224

225 **IRF2 constitutes an intracellular feedback loop that negatively regulates expression**  
226 **of early IFN $\alpha$ -induced genes**

227 To improve the capacity of the model to represent the experimental data, we incorporated  
228 into the core model an additional negative feedback loop that acts exclusively at the  
229 transcriptional level (Fig 3A). As shown in Fig 3B, this model extension indeed improved  
230 the agreement between the mathematical model trajectories and the SOCS1 protein data  
231 (compare Fig 3B to S1B Fig) as well as the mRNA data for the selected IFN $\alpha$ -induced  
232 antiviral genes (compare Fig 3C to S1C Fig). Statistical analysis based on the likelihood  
233 ratio test (S2A Fig) and the Akaike information criterion (S2B Fig) confirmed that the core  
234 model with the additional intracellular feedback was significantly superior to the core  
235 model (S2C Fig).

236 To identify the nature of this negative intracellular factor, we performed a transcription  
237 factor binding site (TFBS) analysis using the HOMER motive discovery approach [21].  
238 The analysis revealed six significantly enriched transcription factor binding motifs in the  
239 genes analyzed in addition to ISRE (Fig 4A), i.e. the motifs corresponding to IRF1, IRF2,  
240 IRF4, PU.1 and STAT5. Because IRF1 is a positive regulator of antiviral genes [22], this  
241 factor was excluded. IRF2 exhibits structural similarity to IRF1 [23] but possesses a  
242 repression domain and functions as a transcriptional repressor that antagonizes IRF1-  
243 induced transcriptional activation [24]. Although IRF2 and IRF4 are structurally similar, the  
244 repressive function of IRF4 was reported to be different from that of IRF2. IRF4 possesses  
245 an autoinhibition domain of DNA binding at the carboxy-terminal region that can mask the  
246 DNA-binding domain of IRF4. PU.1, as part of the Ets-transcription factor family, forms  
247 dimers with IRF4 [25]. The presence of different proteins with similar molecular functions  
248 suggests a complex network of negative regulation of IFN-induced antiviral genes and the  
249 absence of one of these factors might be compensated by the others. To quantify the  
250 impact of the identified transcription factors, we performed siRNA knock-down  
251 experiments. Expression of IRF2, IRF4 and IRF8 was downregulated by siRNA in all  
252 possible combinations and the expression levels of the selected antiviral genes were  
253 analyzed after 24 hours (S2D Fig). Interestingly, almost all combinations that included the  
254 downregulation of IRF2 positively affected gene expression. To further analyze the  
255 characteristics of the putative negative regulator of transcription, model predictions of the  
256 expression dynamics of this intracellular factor (Fig 4B) were compared with the



257 experimentally measured mRNA expression of the selected IRFs. Only the profile of the  
258 expression kinetics of IRF2 were similar to the dynamics predicted by the model for the  
259 expression of the negative regulator (Fig 4C). Therefore, we treated Huh7.5 cells with  
260 IFN $\alpha$  in combination with non-targeting siRNA or siRNA directed against IRF2 and  
261 measured the expression profiles of the selected antiviral genes in a time-resolved  
262 manner. As shown in Fig 4D, knock-down of IRF2 (S2E Fig) significantly enhanced the  
263 expression of all antiviral genes monitored. These results confirmed IRF2 as an important  
264 transcriptional repressor negatively regulating IFN $\alpha$ -induced antiviral expression.

265

### 266 **IL1 $\beta$ amplifies the IFN $\alpha$ -induced gene response**

267 The observation that knock-down of a negative regulator resulted in enhanced expression  
268 of early, intermediate and late IFN $\alpha$ -induced antiviral genes suggested that strategies  
269 could be designed to strengthen the induction of an antiviral response. Since knock-down  
270 or inhibition of an intracellular factor is difficult to achieve *in vivo*, we tested whether a  
271 similar amplified expression of IFN $\alpha$ -induced antiviral genes could also be mimicked by  
272 the addition of an extracellular factor. As it has been previously reported that cross-talk  
273 between IFN $\alpha$  and inflammatory cytokines may occur [26], we focused our analysis on  
274 inflammatory cytokines that are known to act in the liver: interleukin 6 (IL6), IL8 and IL1 $\beta$ .  
275 To experimentally test these cytokines, we performed co-stimulation experiments with  
276 each cytokine and IFN $\alpha$  and quantified the expression of the selected IFN $\alpha$ -induced  
277 antiviral genes in Huh7.5 cells. Co-stimulation with IL8 had no effect on the dynamics of  
278 IFN $\alpha$ -induced gene expression (S3A Fig), whereas treatment with IFN $\alpha$  and IL6 resulted  
279 in a small increase in the expression of the early gene *IRF1* (Fig 5A). Strikingly, co-  
280 stimulation with IFN $\alpha$  and IL1  $\beta$  resulted in markedly enhanced expression of all antiviral  
281 genes examined (Fig 5B). Stimulation of Huh7.5 cells with IL1 $\beta$  alone resulted only in a  
282 minor increase in the expression of *IRF1* and did not elicit the expression of the other  
283 selected antiviral genes. The enhanced expression dynamics in response to co-treatment  
284 with IFN $\alpha$  and IL1 $\beta$  mimicked the effect on the expression dynamics of early, intermediate  
285 and late IFN $\alpha$ -induced antiviral genes observed upon knockdown of IRF2 and was even  
286 further elevated for the early antiviral gene *IRF1* and the late antiviral gene *IFITM3*. These  
287 results suggested that IL1 $\beta$  indeed can act as a strong amplifier of IFN $\alpha$ -induced  
288 expression of antiviral genes.

289

## 290 **IL1 $\beta$ -mediated STAT3 activation enhances the expression of IFN $\alpha$ -induced genes**

291 It was previously reported that IL1 $\beta$  stimulation activates the NF $\kappa$ B-I $\kappa$ B $\alpha$  and the p38  
292 signaling pathways [11]. To analyze which pathway mediated the enhancing effect of IL1 $\beta$   
293 onto IFN $\alpha$ -induced expression of antiviral genes, Huh7.5 cells were treated with IFN $\alpha$ ,  
294 IL1 $\beta$  or with a combination thereof. The dynamics of key signaling proteins in response to  
295 IFN $\alpha$  stimulation for up to 24 hours was analyzed by quantitative immunoblotting and for  
296 each component the area under the activation curve was calculated (Fig 6A, S3B Fig).  
297 These results showed that the phosphorylation of STAT1 was strongly induced by IFN $\alpha$ ,  
298 but not by IL1 $\beta$ . However, co-treatment with IFN $\alpha$  and IL1 $\beta$  resulted in a stronger and  
299 prolonged STAT1 phosphorylation. Single IL1 $\beta$  treatment or co-stimulation with IFN $\alpha$   
300 induced the activation of the p38 pathway and p65 of the NF $\kappa$ B pathway to a similar extent.  
301 Strikingly, phosphorylation of STAT3 was detected after stimulation with IL1 $\beta$  alone as  
302 well as after IL1 $\beta$  and IFN $\alpha$  co-treatment, whereas IFN $\alpha$  alone only resulted in a weak  
303 activation of STAT3. The comparison of the area under the curve of STAT3  
304 phosphorylation showed that STAT3 phosphorylation was significantly increased in the  
305 IL1 $\beta$  and IFN $\alpha$  co-treated samples. To assess whether the increased phosphorylation of  
306 STAT3 correlated with nuclear accumulation of STAT3 in particular at late time points, we  
307 performed live cell imaging experiments with primary hepatocytes from an *mKate-Stat3*  
308 knock-in mouse strain expressing a fluorescently tagged STAT3 [27] (Fig 6B). Compared  
309 to the treatment with IL6 that resulted in an instantaneous nuclear translocation of STAT3  
310 (S3C Fig), nuclear STAT3 was detectable at lower levels and at later time points in  
311 response to IL1 $\beta$  stimulation. However, it was markedly elevated upon co-treatment with  
312 IFN $\alpha$  and IL1 $\beta$  at later time points, in particular 24 hours post treatment (Fig 6B).  
313 Therefore, the sustained STAT3 phosphorylation profiles and the nuclear accumulation of  
314 STAT3 observed upon co-treatment with IFN $\alpha$  and IL1 $\beta$  matched the co-stimulatory effect  
315 of IL1 $\beta$  and IFN $\alpha$  on the expression of the selected IFN $\alpha$ -induced antiviral genes.

316 To ascertain that STAT3 activation contributes to the enhanced expression of the selected  
317 IFN $\alpha$ -induced antiviral genes, single or co-stimulated Huh 7.5 cells were either left  
318 untreated or were co-treated with a STAT3 inhibitory compound (Stattic) [28]. Treatment  
319 of Huh7.5 cells with 10  $\mu$ M Stattic for up to 24 hours had no significant impact on their  
320 viability (S3D Fig). With this dose of Stattic, the induction of STAT3 phosphorylation by

321 co-stimulation with IFN $\alpha$  and IL1 $\beta$  was reduced for the entire observation time (S3E Fig).  
322 Analyzing gene expression, we noticed that at the early time points the expression of all  
323 selected genes induced by IFN $\alpha$  and IL1 $\beta$  co-stimulation was reduced by treatment with  
324 Stattic (Fig 6C). At 24 hours after IFN $\alpha$  and IL1 $\beta$  co-stimulation, expression of both early  
325 and intermediate IFN $\alpha$ -induced antiviral genes was comparable for Stattic-treated and  
326 untreated samples. However, the late IFN $\alpha$ -induced genes, *IFI6* and *IFITM3*, showed a  
327 strong decrease in their expression upon Stattic treatment during the entire observation  
328 time (Fig 6C). Overall, application of the STAT3 inhibitor Stattic had a significant effect on  
329 the expression of all analyzed IFN $\alpha$ -induced antiviral genes. These results indicated that  
330 co-stimulation of cells with IFN $\alpha$  and IL1 $\beta$  enhanced the activation of STAT3, thus  
331 mediating the amplified expression kinetics of IFN $\alpha$ -induced antiviral genes.

### 332

### 333 **IL1 $\beta$ enhances IFN $\alpha$ -induced gene expression in primary human hepatocytes and**

### 334 **viral clearance**

335 To assess whether the IL1 $\beta$ -induced amplification of IFN $\alpha$ -induced expression of antiviral  
336 genes was conserved in primary human hepatocytes and relevant for eliciting an antiviral  
337 response, we first examined the impact of IL1 $\beta$  on the dynamics of IFN $\alpha$ -induced antiviral  
338 genes in these cells. As shown in Fig 7A, consistent with our observations in Huh7.5 cells,  
339 co-stimulation of primary human hepatocytes with IFN $\alpha$  and IL1 $\beta$  increased the  
340 expression especially of the early IFN $\alpha$ -induced gene IRF1 and the late gene IFI6. These  
341 results underscored the importance of our findings also in the context of primary human  
342 hepatocytes.

343 Next, we examined whether the increased expression of IFN $\alpha$ -induced antiviral genes in  
344 response to co-treatment with IFN $\alpha$  and IL1 $\beta$  resulted in enhanced viral clearance. For  
345 these studies we utilized a cell line containing a persistently replicating HCV reporter  
346 replicon (Huh7/LucUbiNeo/JFH1) (Fig 7B). In this cell line, luciferase activity correlates  
347 linearly with viral replication [29]. Treatment of the replicon cells with 500 U/ml IFN $\alpha$  – an  
348 IFN $\alpha$  dose that was employed in the experiment examining activation of signaling  
349 pathways or expression of antiviral genes – resulted in a very rapid inhibition of HCV  
350 replication. At this dose, a detectable but not major difference between treatment with  
351 IFN $\alpha$  alone and the co-stimulation with IFN $\alpha$  and IL1 $\beta$  was observed (S4A Fig). To  
352 increase the resolution of the assay and taking into account the high IFN $\alpha$ -sensitivity of

353 HCV, the applied IFN $\alpha$  and IL1 $\beta$  concentrations were reduced 10-fold. In this setting, co-  
354 stimulation with IFN $\alpha$  and IL1 $\beta$  resulted in a stronger reduction in luciferase activity than  
355 IFN $\alpha$  alone, especially at later time points (>24 hours) (Fig 7C and S4B Fig). In conclusion,  
356 IL1 $\beta$  enhanced the antiviral effect of IFN $\alpha$  treatment and reduced HCV replication.

357  
358 **IL1 $\beta$ -mediated enhanced expression of IFN $\alpha$ -induced genes requires the IL1 $\beta$**   
359 **receptor**

360 To confirm the specificity of the observed augmentation of the IFN $\alpha$  response by IL1 $\beta$ ,  
361 primary mouse hepatocytes were isolated from wildtype and from mice lacking the IL1  
362 receptor (IL1R1<sup>-/-</sup> mice) [30]. Expression analysis of the selected IFN $\alpha$ -induced genes  
363 upon treatment with 500 U/ml murine IFN $\alpha$  or 10 ng/ml murine IL1 $\beta$  confirmed that  
364 treatment with IL1 $\beta$  alone did not induce expression of the selected IFN $\alpha$ -induced genes,  
365 whereas IFN $\alpha$  stimulation significantly upregulated their expression (Fig 8A). Co-  
366 stimulation with IFN $\alpha$  and IL1 $\beta$  synergistically increased the expression of the selected  
367 IFN $\alpha$ -induced antiviral genes. These experiments revealed that mRNA expression profiles  
368 of the selected IFN $\alpha$ -induced antiviral genes in primary mouse hepatocytes are  
369 comparable to those in Huh7.5 cells. Of note, while IFN $\alpha$ -induced expression of the  
370 selected IFN $\alpha$ -induced antiviral genes in hepatocytes from IL1R1<sup>-/-</sup> mice lacking IL1 $\beta$   
371 signaling was comparable to wildtype cells, IL1R1<sup>-/-</sup> cells did not show a synergistic  
372 enhancement of IFN $\alpha$ -induced gene expression upon co-stimulation with IL1 $\beta$ . These  
373 results confirmed that the co-stimulatory effect of IL1 $\beta$  on the IFN $\alpha$ -induced antiviral  
374 response is mediated by the IL1R1 and that the underlying mechanism is conserved in  
375 mouse and human.

376  
377 **Viral infection is enhanced in IL1R1<sup>-/-</sup> mice**

378 To demonstrate the *in vivo* relevance of our findings, wildtype and IL1R1<sup>-/-</sup> mice [30] were  
379 infected with 2 $\times$ 10<sup>6</sup> pfu of LCMV stain WE. Prior to and four days post infection, the  
380 expression of the selected IFN $\alpha$ -induced genes in the liver of the animals was determined  
381 by qRT-PCR. In line with our hypothesis, the mRNA concentrations of the IFN $\alpha$ -induced  
382 genes *Mx1*, *Ifi2712a*, *Trim21* and *Eif2ak2* were significantly reduced in infected IL1R1<sup>-/-</sup>  
383 mice compared to wildtype mice (Fig 8B). This was not due to differences in viral load, as  
384 comparable virus amounts were detected four days post infection (Fig 8C). However, in

385 line with the reduced antiviral response in the liver, we observed a significant increase in  
386 LCMV titers in the liver of IL1R1<sup>-/-</sup> mice as compared to wildtype controls eight days post  
387 infection (Fig 8C). Consistently, immunohistochemical evaluation of liver tissue revealed  
388 that LCMV nucleoprotein (NP) was more abundant in hepatocytes of IL1R1 deficient mice  
389 than in wild type counterparts (Fig 8D). Notably, antiviral T-cell immunity was also reduced  
390 eight days post infection following LCMV infection in IL1R1<sup>-/-</sup> compared to control animals  
391 (S5A-C Fig). In conclusion, the *in vivo* experiments confirmed the importance of the IL1 $\beta$   
392 induced signal transduction mediated by the IL1 receptor for enhancing the IFN-induced  
393 response.

394

## 395 Discussion

396 We observed that the temporal expression profiles of IFN $\alpha$ -induced genes can be  
397 classified into three different groups based on the time point of maximal activation: early,  
398 intermediate and late. By mathematical modeling based on time-resolved experimental  
399 data, our studies revealed that mRNA stability and expression of IRF2 as a negative  
400 regulator of transcription critically determine the expression profiles of IFN $\alpha$ -induced  
401 genes. Strikingly, we observed that IL1 $\beta$  can mimic the impact of IRF2 knockdown and  
402 significantly boost IFN $\alpha$ -induced responses.

403 It has previously been reported that TNF stimulation of mouse fibroblasts for twelve hours  
404 resulted in early, intermediate and late gene expression clusters and that these clusters  
405 differ in mRNA stability [31]. Consistent with these observations, we demonstrated that  
406 the mRNA half-lives of the IFN $\alpha$ -induced antiviral genes indeed differ substantially among  
407 the three groups and correlate with their peak of expression.

408 Positive and negative feedback mechanisms establish a balanced regulatory network of  
409 type I IFN-induced signaling [1] and the combination of transcriptional activators and  
410 repressors is critical for the expression of specific genes and viral clearance. Consistent  
411 with previous results [24], we observed that the transcription factor IRF2 is induced by  
412 IFN $\alpha$ . In addition, we demonstrated that the downregulation of IRF2 by siRNA enhances  
413 antiviral gene expression, which is in agreement with an elevated IFN-induced gene  
414 expression in IRF2-deficient mice [32]. Furthermore, it has been demonstrated that IRF2  
415 knock-down results in the upregulation of IFN-induced genes in the bone marrow [33].  
416 Virus-induced IFN $\beta$  expression is substantially higher in IRF2-deficient mice than in wild-

417 type mice [34], and HCV-infected patients exhibit increased expression of IRF2 [35]. In  
418 line with these observations, we showed that IRF2 negatively regulates the expression of  
419 IFN $\alpha$ -induced genes and represents an important feedback mechanism dampening the  
420 type I IFN response.

421 Additionally, we provided evidence that co-stimulation with IL1 $\beta$  enhances the expression  
422 of IFN $\alpha$ -induced genes. In agreement with this observation, it was previously reported that  
423 IFN $\alpha$  and IL1 $\beta$  co-stimulation in Huh7.5 cells increased the phosphorylation of STAT1 and  
424 resulted in an increased expression of two antiviral proteins, PKR (encoded by *EIF2AK2*)  
425 and OAS, compared to treatment with IFN $\alpha$  alone [18]. In our study, co-stimulation with  
426 IFN $\alpha$  and IL1 $\beta$  rather shifted the peak of STAT1 phosphorylation to later time points.

427 We further showed that IL1 $\beta$  stimulation strikingly induced the phosphorylation of STAT3  
428 at time points later than 6 hours. The IL1 $\beta$ -induced activation profile of STAT3 was  
429 remarkably different from the IL6-induced STAT3 phosphorylation that peaks at one hour  
430 after stimulation. At present, there are only very few reports on STAT3 activation by IL1 $\beta$ .  
431 For example, IL1 $\beta$ -induced phosphorylation of STAT3 was reported in myocytes [36], in  
432 mesangial cells [37] and in HepG2 cells with a weak increase of phosphorylation eight  
433 hours after stimulation [12]. In our study, inhibition of STAT3 by the treatment with the  
434 inhibitor Stattic reduced the phosphorylation of IL1 $\beta$ -induced STAT3 activation and the  
435 expression of antiviral genes after IFN $\alpha$  and IL1 $\beta$  co-stimulation. Likewise, in RAW 264.7  
436 cells, a reduction of LPS-induced STAT3 activation and target gene expression was  
437 observed upon treatment with the inhibitor Stattic [38]. In conclusion, this is to our  
438 knowledge the first report indicating that IL1 $\beta$  stimulation triggers prolonged STAT3  
439 phosphorylation and nuclear translocation.

440 Although IL1 $\beta$  on its own did not affect the expression of IFN $\alpha$ -induced genes in the  
441 observed time frame of 24 h, co-treatment with IFN $\alpha$  elevated their expression and  
442 enhanced for example the antiviral state as inferred from the increased inhibition of HCV  
443 replication. Moreover, in LCMV infection *in vivo*, viral titers were increased in IL1R-knock-  
444 out mice, showing that IL1 $\beta$  signaling through this receptor contributes to viral clearance.  
445 Clinical data demonstrated that levels of pro-inflammatory cytokines including IL1 $\beta$ , IL4  
446 and IL6 are elevated in the sera of patients with HCV infection [39]. However, the role of  
447 IL1 $\beta$  in hepatitis virus-infected individuals and the impact on viral clearance are  
448 controversially discussed. On the one hand, it was reported that IL1 $\beta$  concentrations are

449 within the normal range during IFN $\alpha$  treatment of HCV patients [40] and decrease in  
450 chronically infected patients [41]. On the other hand, Daniels *et al.* demonstrated that the  
451 increased production of IL1 $\beta$  by peripheral blood mononuclear cells during IFN $\alpha$  treatment  
452 contributes to the inhibition of hepatitis B virus replication and promotes viral clearance  
453 [42]. Similarly, Zhu *et al.* reported that IL1 $\beta$  inhibits HCV replication in a hepatoma-derived  
454 replicon cell line [43].

455 In conclusion, we demonstrate that IL1 $\beta$  boosts the expression of IFN $\alpha$ -induced antiviral  
456 genes, and in vivo particularly those with an intermediate and a late expression profile.  
457 IL1 $\beta$  thereby could strengthen the efficacy of therapeutically applied IFN $\alpha$  in particular in  
458 the liver and this knowledge might help to improve IFN-based strategies for the treatment  
459 of viral infections.

460

## 461 **Materials and Methods**

### 462 **Cell Culture**

463 Huh7.5 cells were kindly provided by Charles M. Rice (The Rockefeller University, NY,  
464 RRID:CVCL\_7927) and primary human hepatocytes (PHH) were kindly provided by  
465 Georg Damm (Charité Berlin). Murine hepatocytes were isolated from wildtype or from  
466 IL1R1<sup>-/-</sup> CL57BL/6 mice as previously described [44].

467 All cells were cultivated at 37°C and 5 % CO<sub>2</sub> incubation and 95 % relative humidity.  
468 Informed consent of the patients for the use of tissue for research purposes was obtained  
469 corresponding to the ethical guidelines of the Charité-Universitätsmedizin Berlin. The  
470 Huh7.5 cell line was authenticated using Multiplex Cell Authentication and the purity of  
471 cell line was validated using the Multiplex Cell Contamination Test by Multiplexion  
472 (Heidelberg, Germany) as described recently [45, 46].

473

### 474 **Cells stimulation for protein and mRNA measurements**

475 One day before time-course experiments, 1.7·10<sup>6</sup> Huh7.5 cells or 2·10<sup>6</sup> PHH were seeded  
476 into a 6 cm-diameter dishes or 5.5·10<sup>5</sup> cells per well of 6-well plates in culture medium.  
477 Huh7.5 were cultured in Dulbeccos's Modified Eagle Medium (DMEM, Invitrogen)  
478 supplemented with 10% fetal calf serum (FCS) (Gibco) and 1% P/S (Invitrogen). PHHs  
479 were cultivated in Williams medium E (Biochrom) supplemented with 10% FCS (Gibco),  
480 100 nM dexamethasone, 10  $\mu$ g/ml insulin, 2 mM L-Glutamin (Gibco) and 1% Penicillin-

481 Streptomycin (P/S) (Invitrogen). Prior to stimulation, cells were washed three times with  
482 PBS and cultivated in serum free medium for three hours. Stimulation of cells was  
483 performed by adding the stimulation factor directly into serum free medium. To stop  
484 stimulation, dishes were placed on ice, medium was aspirated and cells were lysed either  
485 with Nonidet P-40 lysis buffer (1% NP40, 150 mM NaCl, 20 mM Tris pH 7.4, 10 mM NaF,  
486 1 mM EDTA pH 8.0, 1 mM ZnCl<sub>2</sub> pH 4, 1 mM MgCl<sub>2</sub>, 1 mM Na<sub>3</sub>VO<sub>4</sub>, 10% Glycerol and  
487 freshly added 2 µg/ml aprotinin and 200 µg/ml AEBSF) or Nonidet P-40 cytoplasmic lysis  
488 buffer (0,4% NP40, 10 mM HEPES pH 7.9, 10 mM KCl, 0.1 mM EDTA, 0.1 mM EGTA  
489 and freshly added 2 µg/ml aprotinin, 200 µg/ml AEBSF, 1 mM DTT, 1 mM NaF and 0.1  
490 mM Na<sub>3</sub>VO<sub>4</sub>) and nuclear lysis buffer (20 mM HEPES pH 7.9, 25% glycerin, 400 mM NaCl,  
491 1 mM EDTA, 1 mM EGTA and freshly added 2 µg/ml aprotinin, 200 µg/ml AEBSF, 1 mM  
492 DTT, 1 mM NaF and 0.1 mM Na<sub>3</sub>VO<sub>4</sub>) for cell fractionation. To measure the viability of  
493 cells upon Static treatment, CellTiter-Blue Viability Assays (Promega) were performed  
494 according to the manufacturer's instructions. Incubation with the dye for 60 min was  
495 followed by measurement of the fluorescence with the infinite F200 pro Reader (Tecan).

496

#### 497 **RNA analysis**

498 Cells were seeded, growth factor depleted and stimulated with IFN $\alpha$  (PBL, 11350-1). Total  
499 RNA was isolated from three independent dishes per time point by passing the lysate  
500 through a QIAshredder (Qiagen) for homogenization, followed by RNA extraction using  
501 the RNeasy Plus Mini Kit (Qiagen) according to manufacturer's protocol. For cDNA  
502 generation, 1 µg of total RNA was used and transcribed with the High-Capacity cDNA  
503 Reverse Transcription Kit (Applied Biosystems) according to manufacturer's instructions.  
504 Quantitative real-time PCR (qRT-PCR) was performed using the hydrolysis-based  
505 Universal Probe Library (UPL) platform (Roche Diagnostics) in combination with the Light  
506 Cycler 480 (Roche Diagnostics). Primers were generated using the automated Assay  
507 Design Center based on species and accession number ([www.lifescience.roche.com](http://www.lifescience.roche.com))  
508 (see S2 Table). Crossing point (CP) values were calculated using the second derivative  
509 maximum method of the Light Cycler 480 software (Roche Diagnostics). An internal  
510 dilution series of template cDNA (stimulated for 1 hour with 500 U/ml IFN $\alpha$ ) was measured  
511 with every gene analyzed for PCR efficiency correction and served as standard curve for  
512 calculation of relative concentrations. Relative concentrations were normalized to HPRT.



513

## 514 **Quantitative immunoblotting**

515 For Immunoprecipitation (IP), the target-specific antibody was added to the cellular lysates  
516 together with 25 µl of Protein A or G sepharose (GE Healthcare) depending on the species  
517 of target antibody and the mixture was incubated overnight rotating at 4°C. For anti-JAK1  
518 (Upstate Millipore, 06-272, RRID:AB\_310087), anti-Tyk2 (Upstate Millipore, 06-638,  
519 RRID:AB\_310197) and anti-STAT1 (Upstate Millipore, 06-501, RRID:AB\_310145) IP,  
520 Protein A sepharose was used. Protein G sepharose was used for anti-SOCS1 (Millipore,  
521 04-002, RRID:AB\_612104) IP. Protein concentration of cellular lysates was determined  
522 using the BCA Assay kit (Pierce/Thermo Scientific) according to the manufacturer's  
523 instructions. Proteins were separated by denaturing 10% or 15% SDS-PAGE. Sample  
524 loading was randomized to avoid systematic errors [47]. The proteins were transferred to  
525 PVDF (STATs, IRF9, USP18) or nitrocellulose membranes (JAK1, TYK2). Membranes  
526 were stained with 0.1% Ponceau Red (Sigma-Aldrich). To detect tyrosine phosphorylation  
527 of immunoprecipitated JAK1 and TYK2, the anti-phosphotyrosine monoclonal antibody  
528 4G10 (Upstate Biotechnology, 05-321, RRID:AB\_309678) was used. Phosphorylation  
529 specific and total antibodies:

530

| <b>Antibody</b>    | <b>Vendor, CatLog</b>                   | <b>RRID</b>      |
|--------------------|-----------------------------------------|------------------|
| anti-phospho-STAT1 | Cell Signaling Technologies, 9171       | RRID:AB_331591   |
| anti-phospho-STAT2 | Cell Signaling Technologies, 4441       | RRID:AB_2198445  |
| anti-IRF9          | BD Transduction Laboratories,<br>610285 | RRID:AB_397680   |
| anti-USP18         | Cell Signaling Technologies, 4813       | RRID:AB_10614342 |
| anti-SOCS1         | Invitrogen, 04-002                      | RRID:AB_612104   |
| anti-phospho-p38   | Cell Signaling Technologies, 4511       | RRID:AB_2139682  |
| anti-phospho-p65   | Cell Signaling Technologies, 3031       | RRID:AB_330559   |
| anti-JAK1          | Cell Signaling Technologies, 06-272     | RRID:AB_310087   |
| anti-TYK2          | Upstate Millipore, 06-638               | RRID:AB_310197   |
| anti-STAT1         | Upstate Millipore, 06-501               | RRID:AB_310145   |
| anti-STAT2         | Upstate Millipore, 06-502               | RRID:AB_310146   |

|                      |                                   |                  |
|----------------------|-----------------------------------|------------------|
| anti-p38             | Cell Signaling Technologies, 9212 | RRID:AB_330713   |
| anti-p65             | Santa Cruz, sc-109                | RRID:AB_632039   |
| anti-calnexin        | <i>Enzo life sciences</i>         | RRID:AB_10616095 |
| anti- $\beta$ -actin | Sigma Aldrich, A5441              | RRID:AB_476744   |
| anti-PARP            | Roche                             | RRID:AB_1602926  |

531  
532 For detection of additional proteins on the same membrane, membranes were incubated  
533 with  $\beta$ -mercaptoethanol and SDS. For normalization, antibodies against calnexin and  $\beta$ -  
534 actin were used for the cytoplasmic fraction and anti-PARP was used for the nuclear  
535 fraction. Secondary horseradish peroxidase-coupled antibodies (anti-rabbit HRP, anti-  
536 goat HRP, Protein A HRP) were purchased from GE Healthcare. Immunoblots were  
537 incubated with ECL or ECL advance substrate (GE Healthcare) and signals were detected  
538 with a CCD camera (ImageQuant LAS 4000 biomolecular imager (GE Healthcare)).  
539 Immunoblot data was quantified using ImageQuant TL version 7.0 software (GE  
540 Healthcare). Quantitative immunoblot data were processed using GellInspector software  
541 [47]. Data normalization was performed by using either the recombinant calibrator proteins  
542 GST-JAK1DN or GST-Tyk2DC for JAK1 and TYK2, respectively, or housekeeping  
543 proteins:  $\beta$ -actin for IRF1, IRF9, USP18, p38 and p65 or calnexin and PARP for STAT1  
544 and STAT2 in the cytoplasm and nucleus, respectively. For smoothing splines to the data,  
545 Matlab's csaps-splines with a smoothing parameter of 0.8 were used.

#### 546 547 **siRNA transfection**

548 For siRNA transfection,  $2.25 \times 10^5$  Huh7.5 cells were seeded in 6-well plates 24 hours prior  
549 to transfection. The next day, cells were washed three times with PBS and cultivated in  
550 P/S free DMEM supplemented with 10% FCS before the transfection with 50 nM siRNA  
551 (Dharmacon) (IRF2: L-011705-02-0005; non-targeting siRNA: D-001810-10-20).  
552 Transfection was performed by incubation of siRNA with Optimem Medium (Gibco, Life  
553 Technologies) and Lipofectamin RNAiMAX (Invitrogen) for 20 minutes at RT and adding  
554 the mixture dropwise to cells. For efficient uptake, cells were incubated with siRNA  
555 transfection mixture for 24 hours. Subsequently, the medium was changed and time  
556 course experiments were performed.

## 558 **Live-cell imaging**

559 Primary hepatocytes (15,000 cells per well, 96-well plate format) derived from *mKate2-*  
560 *STAT3* heterozygous knock-in mice [27] were transduced with adeno-associated viruses  
561 encoding mCerulean-labeled histone-2B during adhesion. Cells were cultivated as  
562 described above, stimulated with ligand, and imaged using a Nikon Eclipse Ti  
563 Fluorescence microscope in combination with NIS-Elements software. Temperature  
564 (37°C), CO<sub>2</sub> (5%) and humidity were held constant through an incubation chamber  
565 enclosing the microscope. Three channels were acquired for each position: bright-field  
566 channel, STAT3 channel (mKate2), and nuclear channel (CFP). Image analysis was  
567 performed using Fiji software, and data were processed using R software.

568

## 569 **Luciferase assay**

570 Luciferase activity was measured as read out for HCV replication. 30,000 cells of the  
571 replicon cell line Huh7/LucUbiNeo/JFH1 [48] were seeded in a 24-well plate two days prior  
572 to the stimulation. Cells were growth factor depleted for 3 hours followed by IFN $\alpha$   
573 treatment. At different time points cells were washed once with PBS and lysed with 100  
574  $\mu$ l luciferase lysis buffer (1% Triton X-100, 25 mM glycil-glycin (pH 7.8), 15 mM MgSO<sub>4</sub>, 4  
575 mM EGTA, 10% Glycerol) directly in the well. Plates were stored at -80°C until  
576 measurement. Luciferase was measured applying 400  $\mu$ l luciferase assay buffer (15 mM  
577 K<sub>3</sub>PO<sub>4</sub> (pH7.8), 25 mM glycil-glycin (pH 7.8), 15 mM MgSO<sub>4</sub>, 4 mM EGTA) with freshly  
578 added 1 mM DTT, 2 mM ATP and 1mM D-Luciferin. Luciferase activity was measured  
579 using Mitras<sup>2</sup> multimode reader LB942 (Berthold).

580

## 581 **Cultivation of primary mouse hepatocytes**

582 Cells were seeded with a density of  $3.5 \times 10^5$  cells per cavity in a collagen-coated 6-well-  
583 plate. For the experiments cells were cultivated under FCS-free conditions in  
584 DMEM/Ham's F-12 (Biochrom) supplemented with 2 mM glutamine and 100 U/ml  
585 penicillin/0.1 mg/ml streptomycin (Cytogen). Cells were stimulated with 500 U/ml of  
586 murine recombinant IFN $\alpha$  (PBL) with or without 10 ng/ml of murine recombinant IL1 $\beta$   
587 (JenaBioscience) for the time points indicated in the respective figure.

588

## 589 **RNA isolation and qRT-PCR of primary mouse hepatocytes**

590 Total cellular RNA was isolated by using the RNeasy Miniprep Kit (Qiagen) as described  
591 in the manufacturer's instructions. 1 µg of total RNA was reverse transcribed with  
592 Quantitect Reverse Transcription Kit (Qiagen) using oligo(dT), which included DNase I  
593 digestion. cDNA was diluted 1/5, and 1.2 µl of the diluted cDNA was added as template  
594 to a final volume of 25 µl including 1x GoTaq qPCR Master Mix according to the  
595 manufacturer's instructions (Promega, Mannheim, Germany). qRT-PCR was performed  
596 using the ViiA7 real-time PCR system (Applied Biosystems). Primers were generated  
597 using the Primer-BLAST design tool from NCBI based on the accession number of the  
598 gene of interest. All primers were purchased from Eurofins MWG Operon (Ebersberg).  
599 Specificity of rtPCR was controlled by no template and no reverse-transcriptase controls.  
600 Semiquantitative PCR results were obtained using the  $\Delta$ CT method. As control gene  
601 *HPRT* was used. Threshold values were normalized to *HPRT* respectively.  
602 RNA purification of liver tissue from LCMV infected mice for qRT-PCR analyses were  
603 performed as previously described [49]. Gene expression of *IRF1*, *MX1*, *ISG12*, *TRIM21*,  
604 *EIF2AK2*, *IFITM3*, *HPRT* was performed using kits from Applied Biosystems. For analysis,  
605 the expression levels of all target genes were normalized to *HPRT* expression ( $\Delta$ Ct). Gene  
606 expression values were then calculated based on the  $\Delta\Delta$ Ct method, using the naïve liver  
607 samples as a control to which all other samples were compared. Relative quantities (RQ)  
608 were determined using the equation:  $RQ=2^{-\Delta\Delta Ct}$ .

609  
610 **LCMV infection of wild-type or IL1R1 knock-out mice**  
611 All mice were on a C57BL/6 genetic background. IL1R1<sup>-/-</sup> mice [30] were obtained from  
612 Jackson Laboratory (mouse strain 003245). All mice were maintained under specific  
613 pathogen-free conditions and experiments have been approved by the LANUV in  
614 accordance with German laws for animal protection (reference number G315). LCMV  
615 strain WE was originally obtained from F. Lehmann-Grube (Heinrich Pette Institute,  
616 Hamburg, Germany) and was propagated in L929 cells as described. Mice were infected  
617 intravenously with  $2 \times 10^6$  plaque forming units (pfu) LCMV-WE. Virus titers were measured  
618 using a plaque forming assay as described previously [49]. Briefly, organs were harvested  
619 into HBSS and homogenized using a Tissue Lyser (Qiagen).  $0.8 \times 10^6$  MC57 cells were  
620 added to previously in 10-fold dilutions titrated virus samples on 24-well plates. After 3h  
621 1% methylcellulose containing medium was added. After 48 h plates were fixed (4%

622 formalin), permeabilized (1% Triton X HBSS), and stained with anti-VL-4 antibody,  
623 peroxidase anti-rat antibody and PPND solved in 50 mM Na<sub>2</sub>HPO<sub>4</sub> and 25 mM citric acid.  
624 Histological analysis was performed on snap frozen tissue as described [49]. Anti-LCMV-  
625 NP (clone: VL4) was used in combination with an alkaline phosphatase system. Tetramer  
626 production, surface and intracellular FCM staining was performed as described previously  
627 [49]. Briefly, single cell suspensions from spleen and liver tissue as well as peripheral  
628 blood lymphocytes were stained using gp33 or np396 MHC class I tetramers (gp33/H-  
629 2Db) for 15 min or gp61 MHC II tetramer for 30 min at 37°C, followed by staining with anti-  
630 CD8 (BD Biosciences) for 30 min at 4°C. For determination of their activation status,  
631 lymphocytes were stained with antibodies against surface molecules as indicated for 30  
632 min at 4°C. For intracellular cytokine stain single suspended splenocytes or liver cells  
633 were incubated with the LCMV-specific peptides gp33, np396, or gp61. After 1 h Brefeldin  
634 A (eBiosciences) was added, followed by additional 5 h incubation at 37°C. After surface  
635 stain with anti-CD8 or anti-CD4 (eBiosciences) cells were fixed with 2% formalin and  
636 permeabilized with PBS containing 1% FCS and 0.1% Saponin and stained with anti-IFN $\gamma$   
637 (eBiosciences) for 30 min at 4°C.

638

### 639 **Microarray analysis**

640 IFN $\alpha$ -induced gene expression data [4] was analyzed by the Robust Multi-array Average  
641 (RMA) [50] algorithm. It was applied for data processing of Affymetrix gene expression  
642 data (Human Gene ST Arrays) using the implementation in the simpleaffy R package  
643 version 2.40.0 (<http://www.bioconductor.org/packages/release/bioc/html/simpleaffy.html>).  
644 All subsequent analyses were performed on the log<sub>2</sub>-scale and the expression of the  
645 individual genes was considered relative to the measured expression of untreated cells at  
646 0 hours. A paired t-test (treated vs. untreated) was used to assess the significance of  
647 IFN $\alpha$ -induced regulation at 1, 2, 3, 4, 8, 12, 24 hours. Because only three genes  
648 (ID8139776, TCEB3CL2, CFC1) were significantly downregulated, we focused on the 53  
649 genes showing a significant upregulation (p<0.05 and average fold-change>2). The time-  
650 point of maximal regulation was considered to subdivide the upregulated genes into three  
651 classes. Genes were visualized with respect to the time-point of maximal regulation and  
652 within the groups with the same time-point according to the fold change at 1 h.

653

## 654 **Quantification of RNA stability**

655 Cells were seeded, growth factor depleted and stimulated with 500 U/ml IFN $\alpha$  for 8 hours  
656 as described above followed by treatment with 5  $\mu$ g/ml actinomycin D to inhibit  
657 transcription. Total RNA was extracted at specific time points and analyzed using qRT-  
658 PCR. RNA half-life was estimated by fitting the mRNA fold expression to an exponential  
659 decay 3-parameter function.  $t_{1/2}$ : mRNA half-life.

$$660 \quad f(t) = d + a \cdot \exp\left(-\frac{\ln(2) \cdot t}{t_{1/2}}\right)$$

## 661 **Quantification of dose-dependency of RNA on IFN $\alpha$**

663 Cells were seeded, growth factor depleted and stimulated as described above and  
664 stimulated with increasing doses of IFN $\alpha$  for 4 hours. Total RNA was extracted and  
665 analyzed using qRT-PCR. A sigmoidal 4-parameter Hill function was fitted to the RNA  
666 expression.

$$667 \quad f(x) = d + \frac{a \cdot x^b}{c^b + x^b}$$

668 Where  $d$  = y-axis intercept,  $a$  = amplitude,  $b$  = slope and  $c$  = x-value of the point of  
669 inflection i.e. the EC<sub>50</sub> dose.

## 670 **Transcription factor binding site analysis**

672 Transcription factor binding site analysis was performed using HOMER software [21]  
673 (<http://homer.salk.edu/homer/ngs/index.html>). Promoter regions of analyzed genes were  
674 analyzed for known transcription factor binding site. For this, a list with identifiers of genes  
675 of interest was submitted to the software and the respective promoter regions were  
676 obtained from a software-specific database. Significant enrichment of found transcription  
677 factor binding sites were set relative to all promoter regions analyzed using  
678 hypergeometric test.

## 679 **Mathematical modeling**

681 The presented modeling approach is based upon a previously published IFN $\alpha$  model [4].  
682 For this study, the model has been extended by incorporating the genetic response of  
683 IFN $\alpha$ -stimulated JAK/STAT signaling. Further, the formation of the receptor complex was

684 simplified so that the complex is activated directly by IFN $\alpha$  binding. In addition, ISGF3  
685 formation and dissociation were previously incorporated as two steps. Here, the complete  
686 formation of ISGF3 was summarized in one step; STAT1, STAT2 and IRF9 bind  
687 synergistically. The final model consists of 30 species and 53 kinetic parameters. All  
688 reactions are defined as ordinary differential equations (ODEs) based on mass action  
689 kinetics in cytoplasm and nucleus. Measured concentrations (STAT1, STAT2, IRF9 and  
690 IFN) were transformed from molecules per cell to nM by using STAT1 concentration as  
691 reference. In the final version of the model, unphosphorylated STAT1 concentration was  
692 identified to be negligible. The current model is implemented into the MATLAB-based  
693 modeling framework D2D [51, 52].

694

### 695 **Parameter estimation**

696 To find the optimal parameter sets that describe the experimental data for each model  
697 structure best, we performed numerical parameter estimation. The D2D framework is  
698 using a parallelized implementation of the CVODES ODE solver. The procedure of  
699 parameter estimation is based on multiple local optimizations for different initial guesses  
700 of the parameters. For the optimization, the LSQNONLIN algorithm (MATLAB, R2011a,  
701 Mathworks) was used. Most kinetic parameters were limited to values between  $10^{-6}$  and  
702 1. Exceptions include translocation parameters. Here, the upper boundary was raised to  
703  $10^2$ . Parameter values close to upper or lower boundaries result from practical non-  
704 identifiability of the model structure. We assume that six orders of magnitude as a  
705 parameter range is sufficient to not hinder the parameter estimation process. For the  
706 random sampling of the multiple starting points, a Latin hypercube method was utilized.  
707 In addition to kinetic parameters, the observation function relating the ODE model to the  
708 experimentally accessible data contains scaling and noise parameters. These non-kinetic  
709 parameters were fitted in parallel to the kinetic parameters as described [53]. Using a  
710 previously established strategy [53], we ensured reliable convergence of our parameter  
711 estimation procedure for the two mathematical models (S2C Fig).

712

### 713 **Prediction profiles**

714 To obtain confidence intervals of the model predictions for the additional internal feedback  
715 loops, we calculated predictions profiles for the respective species as described [54]. For

716 our analysis, prediction profiles have been calculated along the complete time course of  
717 the core model with an additional intracellular feedback and species  
718 “internal\_x\_factor\_mrna” (Fig 4B). Through the calculation of prediction profiles, a range  
719 for the specified trajectories of the species dynamic is given for each calculated time point,  
720 in which the likelihood value of the model stays within a 95% confidence level.

721

## 722 **Rankings (AIC/LRT)**

723 Performances of different model structures are determined by the likelihood  $L$ . For  
724 comparison of the model structures, two different criteria are used (S2D,E Fig). First, we  
725 introduced a variation of the likelihood-ratio test:

$$726 \quad \text{icdf}_{\Delta df}(0.95) - 2 \cdot \log(L)$$

727 where  $\Delta df$  denotes the difference in degrees of freedom between the two selected models  
728 and  $\text{icdf}$  denotes the inverse cumulative density function of the chi-squared distribution.  
729 The results of the likelihood ratio tests with the full model are then used to obtain the  
730 ranking of the corresponding model structures.

731 For the second criterion, all models are compared utilizing the Akaike Information Criterion  
732 (AIC), defined as:

$$733 \quad AIC = 2 \cdot k - 2 \cdot \log(L)$$

734 where  $k$  denotes the degrees of freedom in the respective model. While the AIC provides  
735 a ranking where each model is treated equally, the LRT provides information in terms of  
736 significance for a pairwise comparison of two selected models. In practice, the AIC slightly  
737 favors larger models due to the linear penalization of the degrees of freedom of a model.

738

## 739 **Data availability**

740 Microarray data is available at the Geo database  
741 (<https://www.ncbi.nlm.nih.gov/geo/query/acc.cgi?acc=GSE100928>). All other relevant  
742 data are within the manuscript and its Supporting Information files.

743

744

## 745 **Acknowledgments**

746 We thank Nao Iwamoto and Artyom Vlasov (German Cancer Research Center) for fruitful  
747 discussions and excellent technical assistance.



748  
749 **Author contributions:** KR generated the time–resolved quantitative gene expression  
750 data and performed all the experiments. AS generated the time–resolved quantitative  
751 signaling proteins data and the time–resolved quantitative gene expression data for the  
752 microarray. TM, JT and MS developed the mathematical model. CK analyzed the  
753 microarray data. JW, RB and MB provided the HCV system and contributed to the  
754 corresponding analyses. CE, JH, PAL and JGB performed the mouse experiments. XH  
755 performed single cell experiments. DS and GD provided the primary human hepatocytes.  
756 UK, JT, KR, AS, SC, FS, MT and MS conceived the project and wrote the manuscript. All  
757 authors contributed to and approved the paper.

758

## 759 **References**

- 760 1. Porritt RA, Hertzog PJ. Dynamic control of type I IFN signalling by an integrated  
761 network of negative regulators. *Trends Immunol.* 2015;36(3):150-60. doi:  
762 10.1016/j.it.2015.02.002. PubMed PMID: 25725583.
- 763 2. Thimme R, Binder M, Bartenschlager R. Failure of innate and adaptive immune  
764 responses in controlling hepatitis C virus infection. *FEMS Microbiol Rev.* 2012;36(3):663-  
765 83. doi: 10.1111/j.1574-6976.2011.00319.x. PubMed PMID: 22142141.
- 766 3. Silvennoinen O, Ihle JN, Schlessinger J, Levy DE. Interferon-induced nuclear  
767 signalling by Jak protein tyrosine kinases. *Nature.* 1993;366(6455):583-5. doi:  
768 10.1038/366583a0. PubMed PMID: 7504785.
- 769 4. Maiwald T, Schneider A, Busch H, Sahle S, Gretz N, Weiss TS, et al. Combining  
770 theoretical analysis and experimental data generation reveals IRF9 as a crucial factor for  
771 accelerating interferon alpha-induced early antiviral signalling. *FEBS J.*  
772 2010;277(22):4741-54. Epub 2010/10/23. doi: 10.1111/j.1742-4658.2010.07880.x.  
773 PubMed PMID: 20964804.
- 774 5. Su AI, Pezacki JP, Wodicka L, Brideau AD, Supekova L, Thimme R, et al. Genomic  
775 analysis of the host response to hepatitis C virus infection. *Proc Natl Acad Sci U S A.*  
776 2002;99(24):15669-74. doi: 10.1073/pnas.202608199. PubMed PMID: 12441396;  
777 PubMed Central PMCID: PMC137774.
- 778 6. van Boxel-Dezaire AH, Rani MR, Stark GR. Complex modulation of cell type-  
779 specific signaling in response to type I interferons. *Immunity.* 2006;25(3):361-72. Epub  
780 2006/09/19. doi: 10.1016/j.immuni.2006.08.014. PubMed PMID: 16979568.
- 781 7. Su L, David M. Distinct mechanisms of STAT phosphorylation via the interferon-  
782 alpha/beta receptor. Selective inhibition of STAT3 and STAT5 by piceatannol. *J Biol*  
783 *Chem.* 2000;275(17):12661-6. Epub 2000/04/25. doi: 10.1074/jbc.275.17.12661. PubMed  
784 PMID: 10777558.
- 785 8. Bazhin AV, von Ahn K, Fritz J, Werner J, Karakhanova S. Interferon-alpha Up-  
786 Regulates the Expression of PD-L1 Molecules on Immune Cells Through STAT3 and p38  
787 Signaling. *Front Immunol.* 2018;9:2129. Epub 2018/10/26. doi:

- 788 10.3389/fimmu.2018.02129. PubMed PMID: 30356906; PubMed Central PMCID:  
789 PMCPMC6190899.
- 790 9. De Groof A, Ducreux J, Aleva F, Long AJ, Ferster A, van der Ven A, et al. STAT3  
791 phosphorylation mediates the stimulatory effects of interferon alpha on B cell  
792 differentiation and activation in SLE. *Rheumatology (Oxford)*. 2019. Epub 2019/09/11. doi:  
793 10.1093/rheumatology/kez354. PubMed PMID: 31504941.
- 794 10. Qi YF, Huang YX, Wang HY, Zhang Y, Bao YL, Sun LG, et al. Elucidating the  
795 crosstalk mechanism between IFN-gamma and IL-6 via mathematical modelling. *BMC*  
796 *Bioinformatics*. 2013;14(1):41. Epub 2013/02/07. doi: 10.1186/1471-2105-14-41. PubMed  
797 PMID: 23384097; PubMed Central PMCID: PMCPMC3599299.
- 798 11. Weber A, Wasiliew P, Kracht M. Interleukin-1 (IL-1) pathway. *Sci Signal*.  
799 2010;3(105):cm1. doi: 10.1126/scisignal.3105cm1. PubMed PMID: 20086235.
- 800 12. Albrecht U, Yang X, Asselta R, Keitel V, Tenchini ML, Ludwig S, et al. Activation of  
801 NF-kappaB by IL-1beta blocks IL-6-induced sustained STAT3 activation and STAT3-  
802 dependent gene expression of the human gamma-fibrinogen gene. *Cell Signal*.  
803 2007;19(9):1866-78. doi: 10.1016/j.cellsig.2007.04.007. PubMed PMID: 17543500.
- 804 13. Bode JG, Albrecht U, Haussinger D, Heinrich PC, Schaper F. Hepatic acute phase  
805 proteins--regulation by IL-6- and IL-1-type cytokines involving STAT3 and its crosstalk  
806 with NF-kappaB-dependent signaling. *Eur J Cell Biol*. 2012;91(6-7):496-505. Epub  
807 2011/11/19. doi: 10.1016/j.ejcb.2011.09.008. PubMed PMID: 22093287.
- 808 14. Goldstein I, Paakinaho V, Baek S, Sung MH, Hager GL. Synergistic gene  
809 expression during the acute phase response is characterized by transcription factor  
810 assisted loading. *Nat Commun*. 2017;8(1):1849. Epub 2017/12/01. doi: 10.1038/s41467-  
811 017-02055-5. PubMed PMID: 29185442; PubMed Central PMCID: PMCPMC5707366.
- 812 15. Negash AA, Ramos HJ, Crochet N, Lau DT, Doehle B, Papic N, et al. IL-1beta  
813 production through the NLRP3 inflammasome by hepatic macrophages links hepatitis C  
814 virus infection with liver inflammation and disease. *PLoS Pathog*. 2013;9(4):e1003330.  
815 doi: 10.1371/journal.ppat.1003330. PubMed PMID: 23633957; PubMed Central PMCID:  
816 PMCPMC3635973.
- 817 16. Guarda G, Braun M, Staehli F, Tardivel A, Mattmann C, Forster I, et al. Type I  
818 interferon inhibits interleukin-1 production and inflammasome activation. *Immunity*.  
819 2011;34(2):213-23. doi: 10.1016/j.immuni.2011.02.006. PubMed PMID: 21349431.
- 820 17. Mayer-Barber KD, Andrade BB, Oland SD, Amaral EP, Barber DL, Gonzales J, et  
821 al. Host-directed therapy of tuberculosis based on interleukin-1 and type I interferon  
822 crosstalk. *Nature*. 2014;511(7507):99-103. Epub 2014/07/06. doi: 10.1038/nature13489.  
823 PubMed PMID: 24990750; PubMed Central PMCID: PMCPMC4809146.
- 824 18. Ichikawa T, Nakao K, Nakata K, Yamashita M, Hamasaki K, Shigeno M, et al.  
825 Involvement of IL-1beta and IL-10 in IFN-alpha-mediated antiviral gene induction in  
826 human hepatoma cells. *Biochem Biophys Res Commun*. 2002;294(2):414-22. Epub  
827 2002/06/08. doi: 10.1016/S0006-291X(02)00502-8. PubMed PMID: 12051728.
- 828 19. Schoggins JW, Rice CM. Interferon-stimulated genes and their antiviral effector  
829 functions. *Curr Opin Virol*. 2011;1(6):519-25. doi: 10.1016/j.coviro.2011.10.008. PubMed  
830 PMID: 22328912; PubMed Central PMCID: PMC3274382.
- 831 20. van Tol S, Hage A, Giraldo MI, Bharaj P, Rajsbaum R. The TRIMendous Role of  
832 TRIMs in Virus-Host Interactions. *Vaccines (Basel)*. 2017;5(3). doi:  
833 10.3390/vaccines5030023. PubMed PMID: 28829373; PubMed Central PMCID:  
834 PMCPMC5620554.

- 835 21. Heinz S, Benner C, Spann N, Bertolino E, Lin YC, Laslo P, et al. Simple  
836 combinations of lineage-determining transcription factors prime cis-regulatory elements  
837 required for macrophage and B cell identities. *Mol Cell*. 2010;38(4):576-89. doi:  
838 10.1016/j.molcel.2010.05.004. PubMed PMID: 20513432; PubMed Central PMCID:  
839 PMCPMC2898526.
- 840 22. Miyamoto M, Fujita T, Kimura Y, Maruyama M, Harada H, Sudo Y, et al. Regulated  
841 expression of a gene encoding a nuclear factor, IRF-1, that specifically binds to IFN-beta  
842 gene regulatory elements. *Cell*. 1988;54(6):903-13. PubMed PMID: 3409321.
- 843 23. Harada H, Fujita T, Miyamoto M, Kimura Y, Maruyama M, Furia A, et al. Structurally  
844 similar but functionally distinct factors, IRF-1 and IRF-2, bind to the same regulatory  
845 elements of IFN and IFN-inducible genes. *Cell*. 1989;58(4):729-39. doi: 10.1016/0092-  
846 8674(89)90107-4. PubMed PMID: 2475256.
- 847 24. Dhar D, Roy S, Das S. Translational control of the interferon regulatory factor 2  
848 mRNA by IRES element. *Nucleic Acids Res*. 2007;35(16):5409-21. doi:  
849 10.1093/nar/gkm524. PubMed PMID: 17698501; PubMed Central PMCID:  
850 PMCPMC2018642.
- 851 25. Escalante CR, Brass AL, Pongubala JM, Shatova E, Shen L, Singh H, et al. Crystal  
852 structure of PU.1/IRF-4/DNA ternary complex. *Mol Cell*. 2002;10(5):1097-105. doi:  
853 10.1016/S1097-2765(02)00703-7. PubMed PMID: 12453417.
- 854 26. Gough DJ, Messina NL, Hii L, Gould JA, Sabapathy K, Robertson AP, et al.  
855 Functional crosstalk between type I and II interferon through the regulated expression of  
856 STAT1. *PLoS Biol*. 2010;8(4):e1000361. Epub 2010/05/04. doi:  
857 10.1371/journal.pbio.1000361. PubMed PMID: 20436908; PubMed Central PMCID:  
858 PMCPMC2860501.
- 859 27. Sobotta S, Raue A, Huang X, Vanlier J, Junger A, Bohl S, et al. Model Based  
860 Targeting of IL-6-Induced Inflammatory Responses in Cultured Primary Hepatocytes to  
861 Improve Application of the JAK Inhibitor Ruxolitinib. *Front Physiol*. 2017;8:775. doi:  
862 10.3389/fphys.2017.00775. PubMed PMID: 29062282; PubMed Central PMCID:  
863 PMC5640784.
- 864 28. Schust J, Sperl B, Hollis A, Mayer TU, Berg T. Stattic: a small-molecule inhibitor of  
865 STAT3 activation and dimerization. *Chem Biol*. 2006;13(11):1235-42. Epub 2006/11/23.  
866 doi: 10.1016/j.chembiol.2006.09.018. PubMed PMID: 17114005.
- 867 29. Vrolijk JM, Kaul A, Hansen BE, Lohmann V, Haagmans BL, Schalm SW, et al. A  
868 replicon-based bioassay for the measurement of interferons in patients with chronic  
869 hepatitis C. *J Virol Methods*. 2003;110(2):201-9. doi: 10.1016/S0166-0934(03)00134-4.  
870 PubMed PMID: 12798249.
- 871 30. Glaccum MB, Stocking KL, Charrier K, Smith JL, Willis CR, Maliszewski C, et al.  
872 Phenotypic and functional characterization of mice that lack the type I receptor for IL-1. *J*  
873 *Immunol*. 1997;159(7):3364-71. PubMed PMID: 9317135.
- 874 31. Hao S, Baltimore D. The stability of mRNA influences the temporal order of the  
875 induction of genes encoding inflammatory molecules. *Nat Immunol*. 2009;10(3):281-8.  
876 Epub 2009/02/10. doi: 10.1038/ni.1699. PubMed PMID: 19198593; PubMed Central  
877 PMCID: PMCPMC2775040.
- 878 32. Hida S, Ogasawara K, Sato K, Abe M, Takayanagi H, Yokochi T, et al. CD8(+) T  
879 cell-mediated skin disease in mice lacking IRF-2, the transcriptional attenuator of  
880 interferon-alpha/beta signaling. *Immunity*. 2000;13(5):643-55. doi: S1074-  
881 7613(00)00064-9 [pii]. PubMed PMID: 11114377.

- 882 33. Honda K, Mizutani T, Taniguchi T. Negative regulation of IFN-alpha/beta signaling  
883 by IFN regulatory factor 2 for homeostatic development of dendritic cells. *Proc Natl Acad*  
884 *Sci U S A*. 2004;101(8):2416-21. PubMed PMID: 14983024; PubMed Central PMCID:  
885 PMCPMC356965.
- 886 34. Matsuyama T, Kimura T, Kitagawa M, Pfeffer K, Kawakami T, Watanabe N, et al.  
887 Targeted disruption of IRF-1 or IRF-2 results in abnormal type I IFN gene induction and  
888 aberrant lymphocyte development. *Cell*. 1993;75(1):83-97. PubMed PMID: 8402903.
- 889 35. Masumi A, Ito M, Mochida K, Hamaguchi I, Mizukami T, Momose H, et al.  
890 Enhanced RIG-I expression is mediated by interferon regulatory factor-2 in peripheral  
891 blood B cells from hepatitis C virus-infected patients. *Biochem Biophys Res Commun*.  
892 2010;391(4):1623-8. doi: 10.1016/j.bbrc.2009.12.092. PubMed PMID: 20034464.
- 893 36. Ng DC, Long CS, Bogoyevitch MA. A role for the extracellular signal-regulated  
894 kinase and p38 mitogen-activated protein kinases in interleukin-1 beta-stimulated delayed  
895 signal transducer and activator of transcription 3 activation, atrial natriuretic factor  
896 expression, and cardiac myocyte morphology. *J Biol Chem*. 2001;276(31):29490-8. doi:  
897 10.1074/jbc.M100699200. PubMed PMID: 11382751.
- 898 37. Yu Z, Zhang W, Kone BC. Signal transducers and activators of transcription 3  
899 (STAT3) inhibits transcription of the inducible nitric oxide synthase gene by interacting  
900 with nuclear factor kappaB. *Biochem J*. 2002;367(Pt 1):97-105. doi: 10.1042/BJ20020588.  
901 PubMed PMID: 12057007; PubMed Central PMCID: PMCPMC1222853.
- 902 38. Samavati L, Rastogi R, Du W, Huttemann M, Fite A, Franchi L. STAT3 tyrosine  
903 phosphorylation is critical for interleukin 1 beta and interleukin-6 production in response  
904 to lipopolysaccharide and live bacteria. *Mol Immunol*. 2009;46(8-9):1867-77. doi:  
905 10.1016/j.molimm.2009.02.018. PubMed PMID: 19299019.
- 906 39. Lapinski TW. The levels of IL-1beta, IL-4 and IL-6 in the serum and the liver tissue  
907 of chronic HCV-infected patients. *Arch Immunol Ther Exp (Warsz)*. 2001;49(4):311-6.  
908 PubMed PMID: 11726034.
- 909 40. Naveau S, Emilie D, Borotto E, Portier A, Lazizi Y, Giraud V, et al. Interleukin-1  
910 receptor antagonist plasma concentration is specifically increased by alpha-2A-interferon  
911 treatment. *J Hepatol*. 1997;27(2):272-5. PubMed PMID: 9288600.
- 912 41. Kishihara Y, Hayashi J, Yoshimura E, Yamaji K, Nakashima K, Kashiwagi S. IL-1  
913 beta and TNF-alpha produced by peripheral blood mononuclear cells before and during  
914 interferon therapy in patients with chronic hepatitis C. *Dig Dis Sci*. 1996;41(2):315-21.  
915 PubMed PMID: 8601375.
- 916 42. Daniels HM, Meager A, Eddleston AL, Alexander GJ, Williams R. Spontaneous  
917 production of tumour necrosis factor alpha and interleukin-1 beta during interferon-alpha  
918 treatment of chronic HBV infection. *Lancet*. 1990;335(8694):875-7. doi: 0140-  
919 6736(90)90475-K [pii]. PubMed PMID: 1969983.
- 920 43. Zhu H, Liu C. Interleukin-1 inhibits hepatitis C virus subgenomic RNA replication  
921 by activation of extracellular regulated kinase pathway. *J Virol*. 2003;77(9):5493-8. Epub  
922 2003/04/15. PubMed PMID: 12692250; PubMed Central PMCID: PMCPMC153991.
- 923 44. Klingmuller U, Bauer A, Bohl S, Nickel PJ, Breitkopf K, Dooley S, et al. Primary  
924 mouse hepatocytes for systems biology approaches: a standardized in vitro system for  
925 modelling of signal transduction pathways. *Syst Biol (Stevenage)*. 2006;153(6):433-47.  
926 Epub 2006/12/26. PubMed PMID: 17186705.
- 927 45. Castro F, Dirks WG, Fahrnich S, Hotz-Wagenblatt A, Pawlita M, Schmitt M. High-  
928 throughput SNP-based authentication of human cell lines. *Int J Cancer*. 2013;132(2):308-

- 929 14. Epub 2012/06/16. doi: 10.1002/ijc.27675. PubMed PMID: 22700458; PubMed Central  
930 PMCID: PMCPMC3492511.
- 931 46. Schmitt M, Pawlita M. High-throughput detection and multiplex identification of cell  
932 contaminations. *Nucleic Acids Res.* 2009;37(18):e119. Epub 2009/07/11. doi:  
933 10.1093/nar/gkp581. PubMed PMID: 19589807; PubMed Central PMCID:  
934 PMCPMC2764421.
- 935 47. Schilling M, Maiwald T, Bohl S, Kollmann M, Kreutz C, Timmer J, et al.  
936 Computational processing and error reduction strategies for standardized quantitative  
937 data in biological networks. *FEBS J.* 2005;272(24):6400-11. doi: 10.1111/j.1742-  
938 4658.2005.05037.x. PubMed PMID: 16336276.
- 939 48. Jo J, Aichele U, Kersting N, Klein R, Aichele P, Bisse E, et al. Analysis of CD8+ T-  
940 cell-mediated inhibition of hepatitis C virus replication using a novel immunological model.  
941 *Gastroenterology.* 2009;136(4):1391-401. doi: 10.1053/j.gastro.2008.12.034. PubMed  
942 PMID: 19185579.
- 943 49. Lang PA, Xu HC, Grusdat M, McIlwain DR, Pandya AA, Harris IS, et al. Reactive  
944 oxygen species delay control of lymphocytic choriomeningitis virus. *Cell Death Differ.*  
945 2013;20(4):649-58. doi: 10.1038/cdd.2012.167. PubMed PMID: 23328631; PubMed  
946 Central PMCID: PMCPMC3595491.
- 947 50. Irizarry RA, Hobbs B, Collin F, Beazer-Barclay YD, Antonellis KJ, Scherf U, et al.  
948 Exploration, normalization, and summaries of high density oligonucleotide array probe  
949 level data. *Biostatistics.* 2003;4(2):249-64. doi: 10.1093/biostatistics/4.2.249. PubMed  
950 PMID: 12925520.
- 951 51. Raue A, Steiert B, Schelker M, Kreutz C, Maiwald T, Hass H, et al. Data2Dynamics:  
952 a modeling environment tailored to parameter estimation in dynamical systems.  
953 *Bioinformatics.* 2015;31(21):3558-60. doi: 10.1093/bioinformatics/btv405. PubMed PMID:  
954 26142188.
- 955 52. Adlung L, Kar S, Wagner MC, She B, Chakraborty S, Bao J, et al. Protein  
956 abundance of AKT and ERK pathway components governs cell type-specific regulation of  
957 proliferation. *Mol Syst Biol.* 2017;13(1):904. doi: 10.15252/msb.20167258. PubMed PMID:  
958 28123004; PubMed Central PMCID: PMC5293153.
- 959 53. Raue A, Schilling M, Bachmann J, Matteson A, Schelker M, Kaschek D, et al.  
960 Lessons learned from quantitative dynamical modeling in systems biology. *PLoS One.*  
961 2013;8(9):e74335. doi: 10.1371/journal.pone.0074335. PubMed PMID: 24098642;  
962 PubMed Central PMCID: PMCPMC3787051.
- 963 54. Kreutz C, Raue A, Kaschek D, Timmer J. Profile likelihood in systems biology.  
964 *FEBS J.* 2013;280(11):2564-71. doi: 10.1111/febs.12276. PubMed PMID: 23581573.

965

966 **Figures**

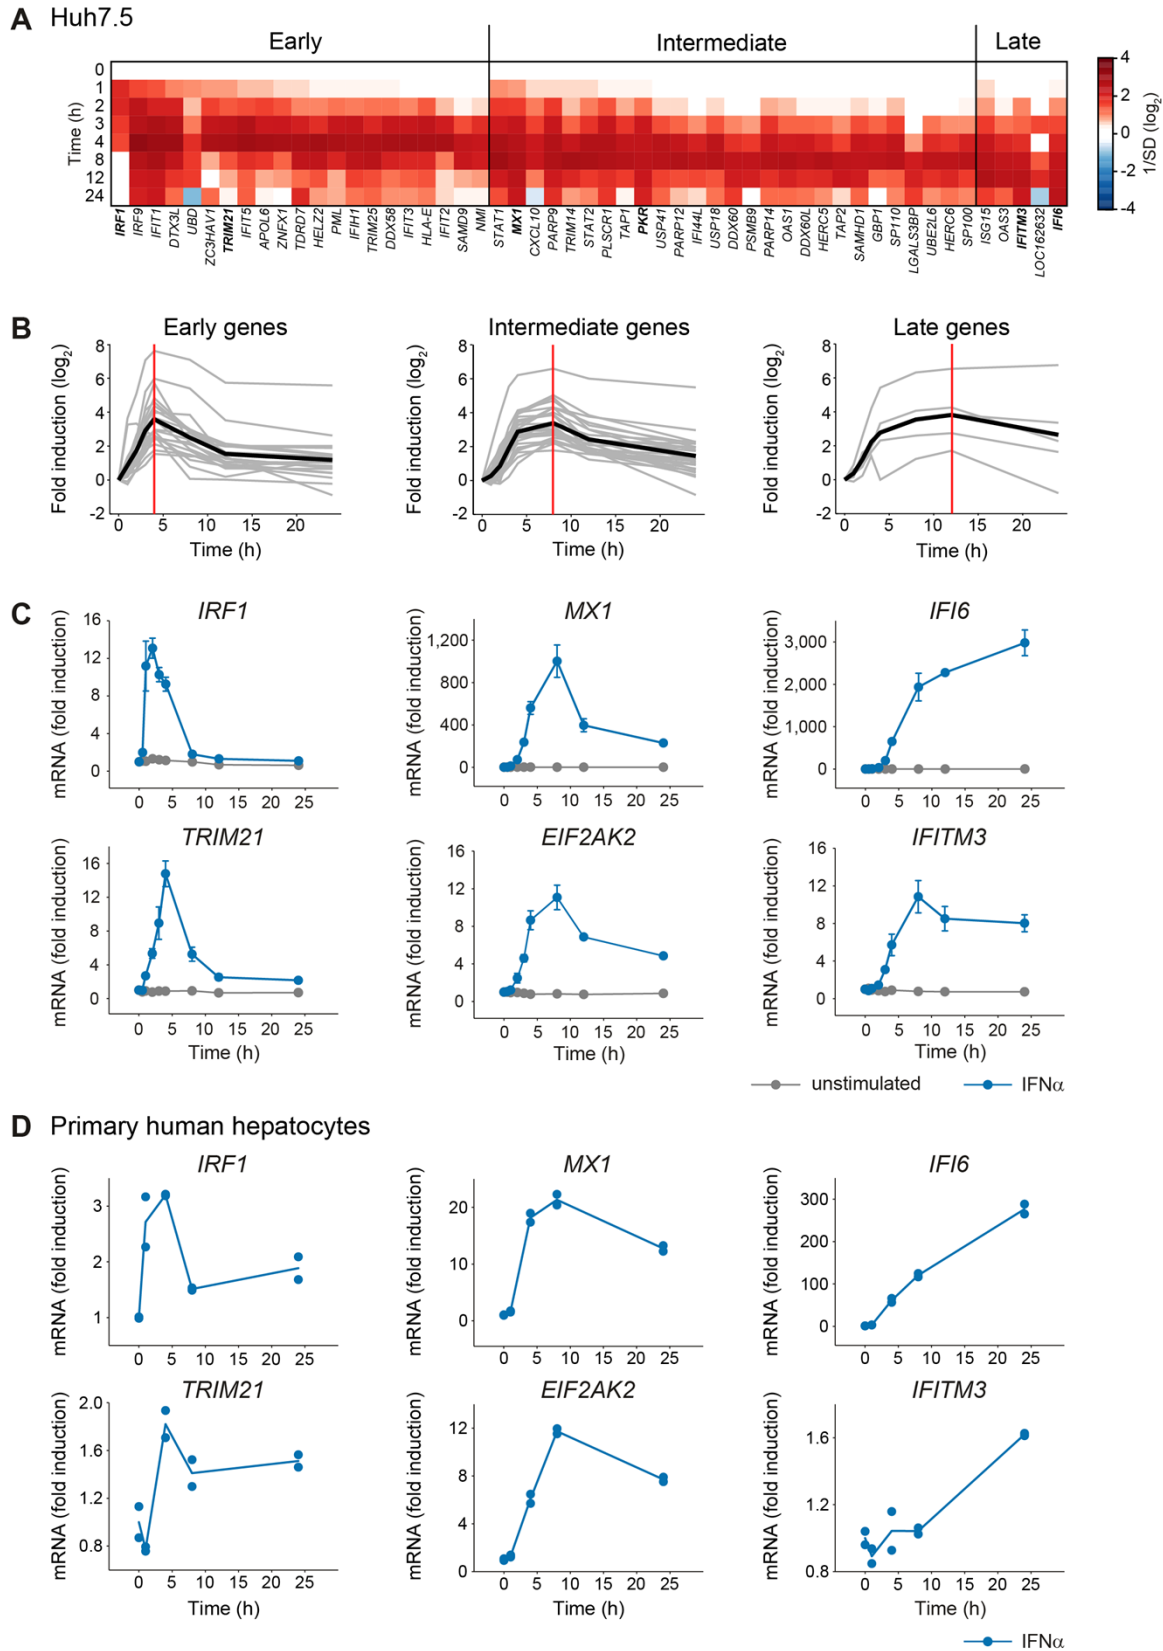

968 **Fig 1: Early, intermediate and late expression profiles of IFN $\alpha$ -induced genes. (A)**  
969 Microarray expression data for Huh7.5 cells stimulated with 500 U/ml IFN $\alpha$ . The heatmap  
970 shows the temporal expression patterns of 53 significantly upregulated genes, grouped  
971 according to their peak expression time. **(B)** The induction of the genes depicted in **A** is  
972 displayed in a time-resolved manner according to the respective groups (grey curves).  
973 The average expression of each group is indicated by a solid black line. The vertical red  
974 lines indicate the time points of maximal induction. **(C)** Huh7.5 cells were stimulated with  
975 500 U/ml IFN $\alpha$  or left untreated and two representative antiviral genes per group were  
976 analyzed by qRT-PCR. The error bars represent SD of biological triplicates.  
977 **(D)** IFN $\alpha$ -induced mRNA expression in primary human hepatocytes. Primary human  
978 hepatocytes were growth factor depleted and stimulated with 500 U/ml IFN $\alpha$ . RNA was  
979 extracted at the indicated time points and analyzed using qRT-PCR. Points: experimental  
980 data; lines: average of biological duplicates.

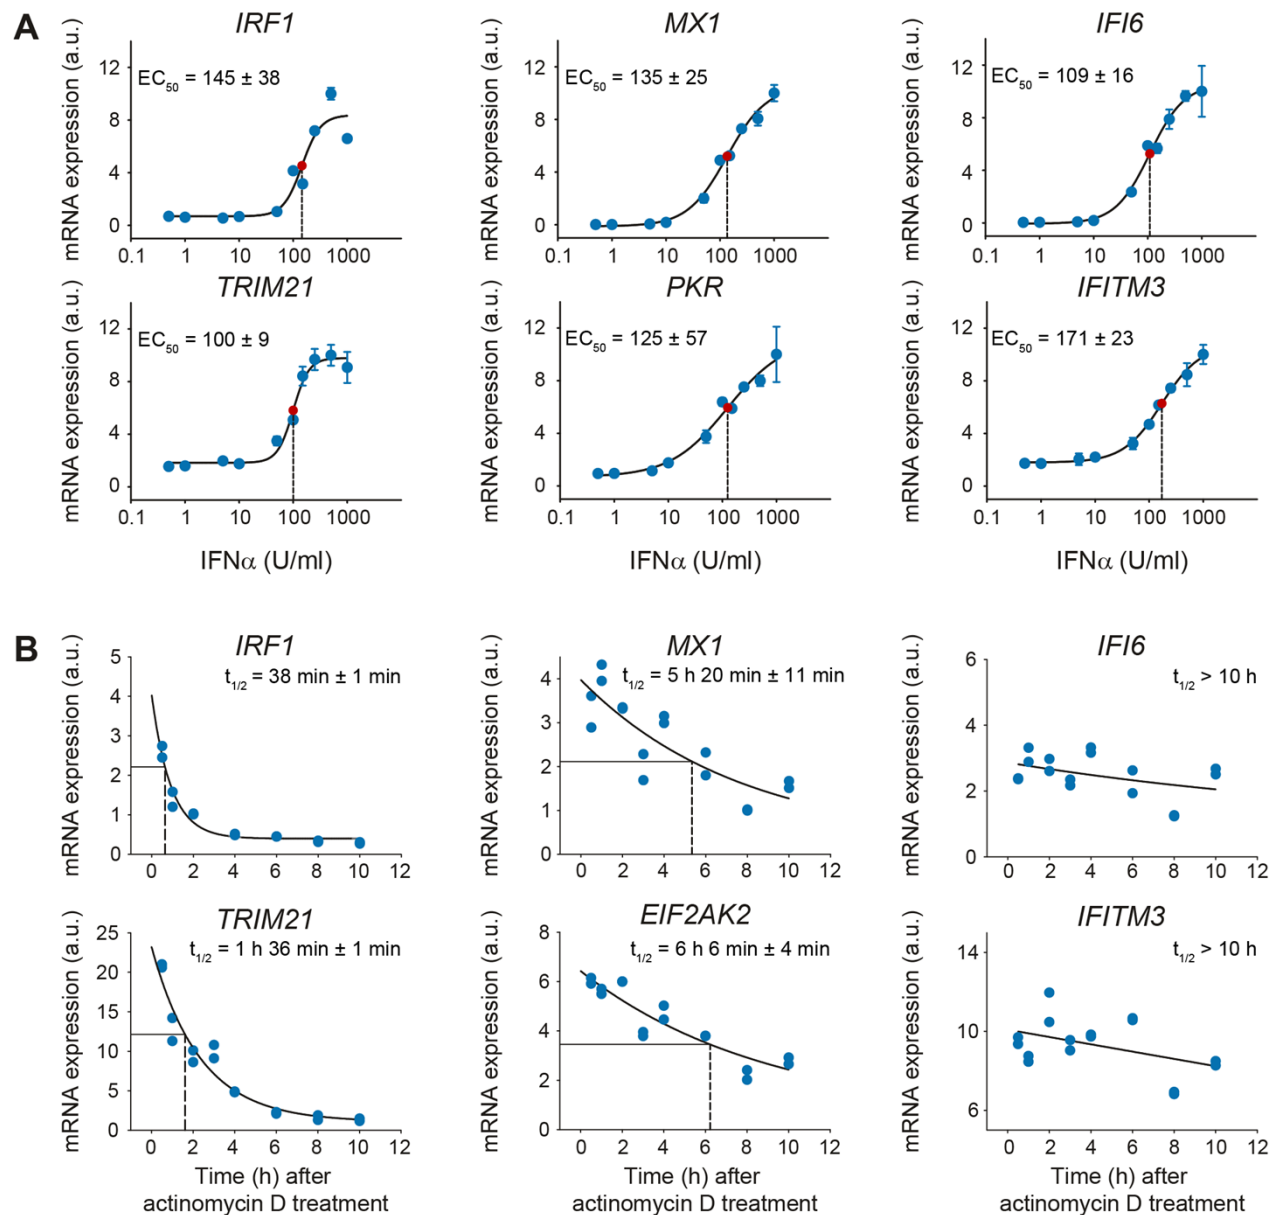

982 **Fig 2: Difference in mRNA stability despite comparable dose-dependency of the**  
 983 **expression profiles of given antiviral genes. (A)** IFN $\alpha$  dose-dependent mRNA  
 984 expression of antiviral genes. Huh7.5 cells were treated with increasing doses of IFN $\alpha$  for  
 985 4 hours. The cells were lysed, total RNA was extracted and analyzed by qRT-PCR. The  
 986 error bars represent standard deviations (SD) based on biological triplicates. Regression  
 987 line: sigmoidal four-parameter Hill function; red point: inflection point; dashed line:  
 988 calculated EC<sub>50</sub>; a.u.: arbitrary units.



989 **(B)** Quantification of the mRNA half-lives of the selected antiviral genes. Huh7.5 cells were  
990 stimulated with 500 U/ml IFN $\alpha$  for 8 hours and then treated with 5 ng/ml actinomycin D for  
991 the indicated times. Total RNA was extracted and analyzed by qRT-PCR. The data points  
992 represent biological duplicates. Regression line: three-parameter exponential decay  
993 function, dashed line: calculated RNA half-life.

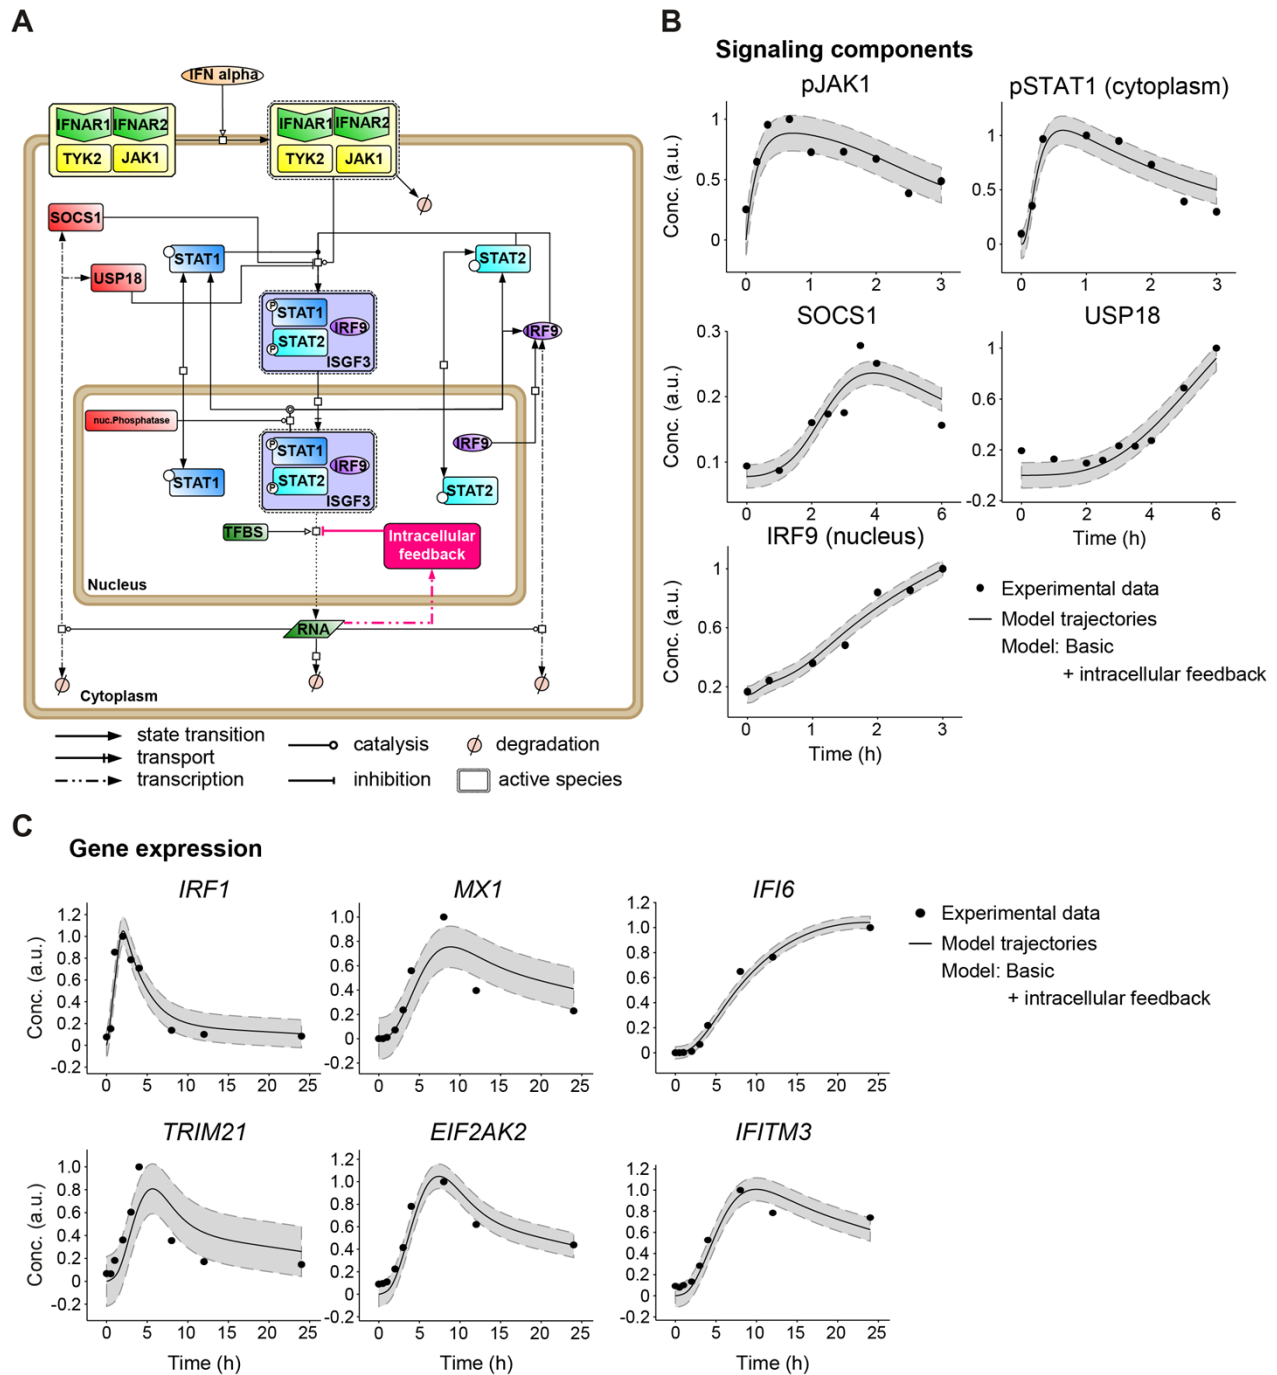

994  
 995 **Fig 3: Core mathematical model with an additional intracellular feedback of IFN $\alpha$ -**  
 996 **induced JAK/STAT signaling and gene expression (A) Schematic representation of**  
 997 **the core model with an additional intracellular feedback according to Systems Biology**  
 998 **Graphical Notation. TFBS: transcription factor-binding site. (B-C) Trajectories of the core**  
 999 **model with an additional intracellular feedback are shown together with the dynamic**

1000 behavior of the core components of the JAK/STAT signaling pathway measured by  
1001 quantitative immunoblotting (**B**) and to the expression of IFN $\alpha$ -induced genes examined  
1002 by qRT-PCR (**C**) after stimulation of Huh7.5 cells with 500 U/ml IFN $\alpha$ . Filled circles:  
1003 experimental data; line: model trajectories, shades: estimated error; a.u. arbitrary units.

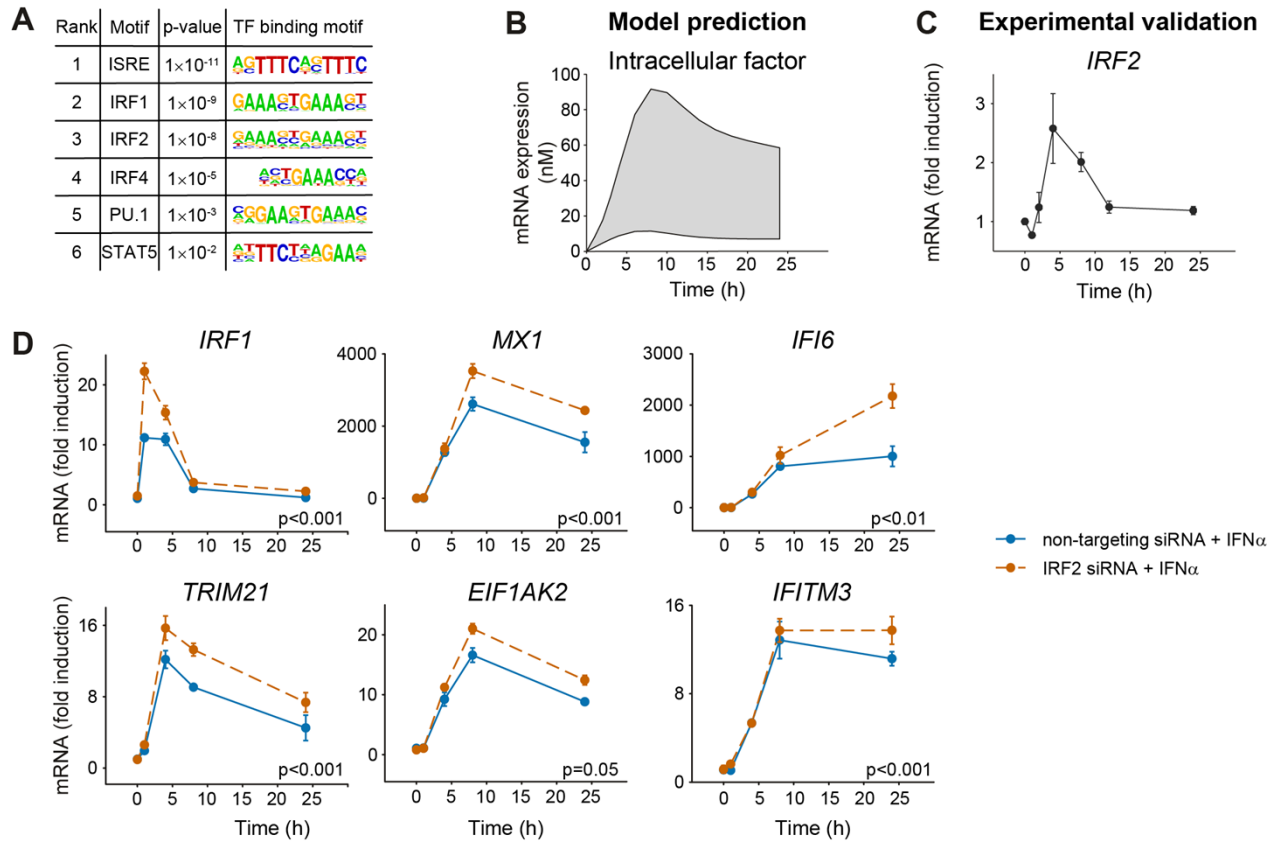

1004  
1005 **Fig 4 The expression profiles of the selected IFN $\alpha$ -stimulated genes are negatively**  
1006 **influenced by the intracellular factor IRF2. (A)** Transcription factor binding site analysis  
1007 by the HOMER motifs software revealed six significantly regulated transcription factor  
1008 binding motifs. The six most significantly enriched motifs according to the p-value and  
1009 their sequence motifs are shown. **(B)** Model prediction of the mRNA expression profile of  
1010 the negative regulatory intracellular factor. Shading represents the uncertainty of the  
1011 prediction. **(C)** Expression profile of *IRF2* mRNA after treatment with 500 U/ml IFN $\alpha$  was  
1012 detected by qRT-PCR. **(D)** Upregulation of gene expression by decreased IRF2  
1013 expression. Huh7.5 cells were incubated with 50 nM siRNA directed against IRF2 (orange)  
1014 or non-targeting control (blue) for 24 hours, and then treated with 500 U/ml IFN $\alpha$ . The  
1015 cells were lysed at the indicated time points and total RNA was extracted and analyzed

1016 by qRT-PCR. The error bars represent SD of biological triplicates. Significance was tested  
1017 by 2-way ANOVA.

## A Co-Stimulation with IL6

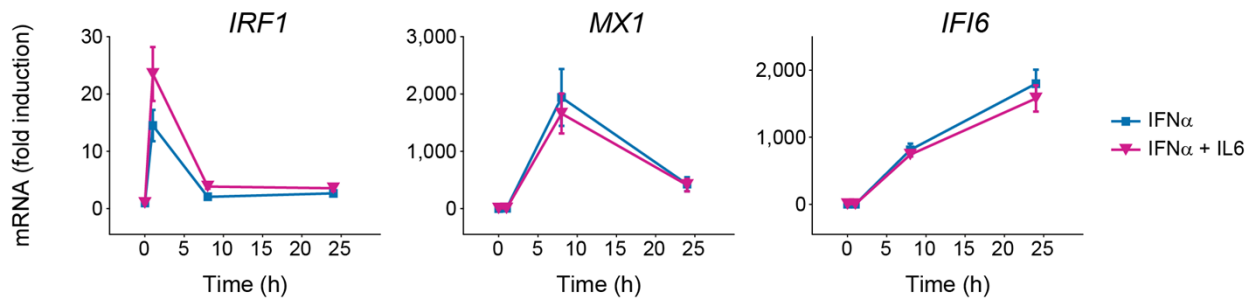

## B Co-Stimulation with IL1 $\beta$

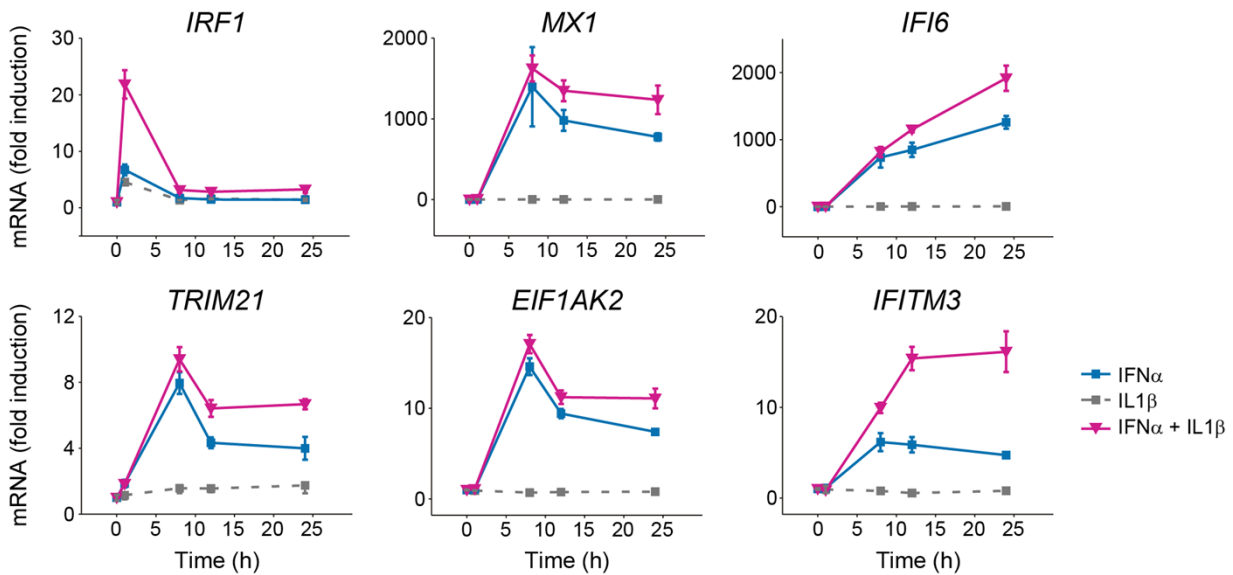

1018

1019 **Fig 5 Enhanced IFN $\alpha$ -induced gene expression after co-stimulation with IFN $\alpha$  and**

1020 **IL1 $\beta$ .** (A) Co-stimulation with IFN $\alpha$  and IL6. Huh7.5 cells were growth factor depleted

1021 followed by single treatment with 500 U/ml IFN $\alpha$  alone or in combination with 5 ng/ml

1022 IL6. At indicated time points RNA was extracted and analyzed using qRT-PCR. Error bars

1023 represent SD of biological triplicates. (B) IFN $\alpha$ -induced gene expression after co-

1024 treatment with IFN $\alpha$  and IL1 $\beta$ . Huh7.5 cells were treated with 500 U/ml IFN $\alpha$ , were

1025 stimulated with 500 U/ml IFN $\alpha$  alone or were co-treated with 500 U/ml IFN $\alpha$  and 10 ng/ml

1026 IL1 $\beta$ . RNA was extracted at the indicated time points and analyzed by qRT-PCR. Error

1027 bars represent SD of biological triplicates.

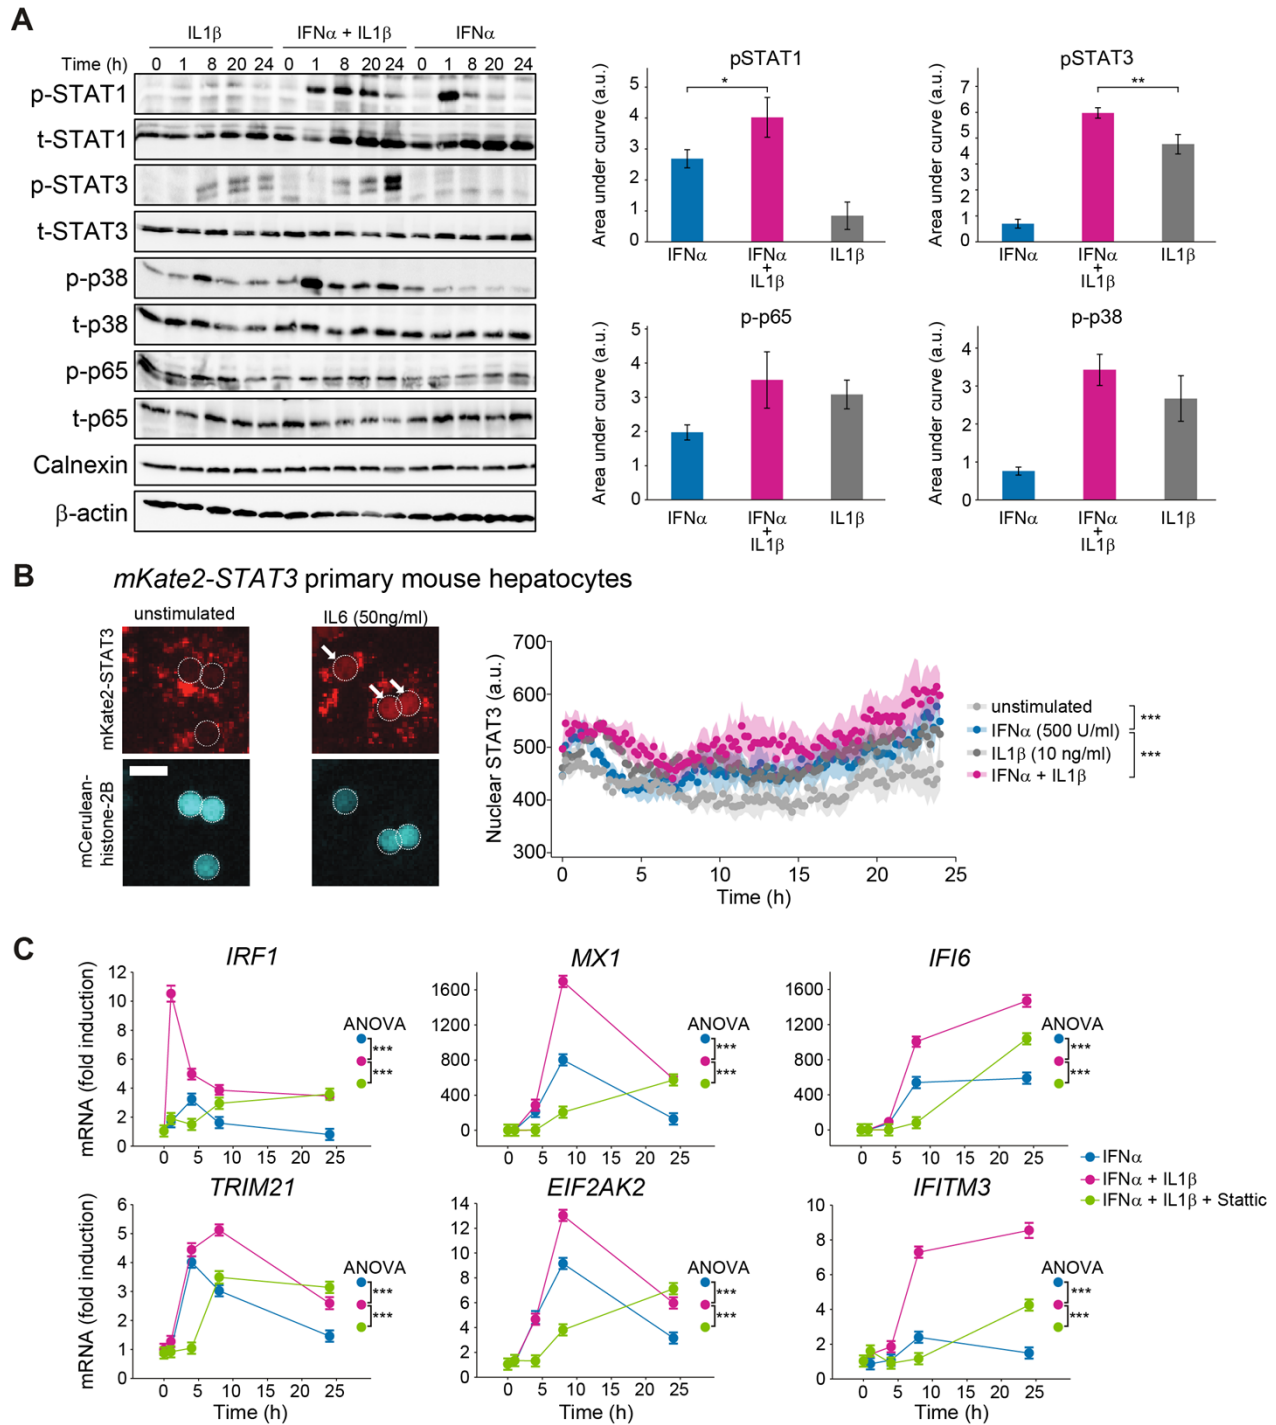

1028  
 1029 **Fig 6 Co-stimulation of IFN $\alpha$  and IL1 $\beta$  results in phosphorylation of STAT3. (A)**  
 1030 Huh7.5 cells were single or co-stimulated with 500 U/ml IFN $\alpha$  and 10 ng/ml IL1 $\beta$ . Cells  
 1031 were lysed at indicated time points and analyzed using quantitative immunoblotting. Error  
 1032 bars represent SEM of three biological replicates. (B) Primary mouse hepatocytes from

1033 *mKate2-Stat3* knock-in mice were growth factor depleted overnight and stimulated with  
1034 IL6 or left untreated. Representative images of cells expressing a mCerulean-histone-2B  
1035 nuclear marker are depicted. The dotted line indicates the outline of the nuclei and white  
1036 arrows indicate nuclear STAT3. The right panel indicates the quantification of the nuclear  
1037 mKate2-STAT3 intensity of primary mouse hepatocytes stimulated with IL1 $\beta$ , IFN $\alpha$ , co-  
1038 stimulated or left unstimulated. The quantification is based on 20 cells per condition;  
1039 shading indicates SEM; scale bar=25  $\mu$ m. Significance was tested by two-way ANOVA,  
1040 \*\*\*,  $p < 0.001$ . (C) Huh7.5 cells were pre-treated for 30 minutes with 10  $\mu$ M STAT3 inhibitor  
1041 Stattic followed by 500 U/ml IFN $\alpha$  in combination with 10 ng/ml IL1 $\beta$ . mRNA was extracted  
1042 at indicated time points and analyzed using qRT-PCR. Error bars represent SD of  
1043 biological triplicates.



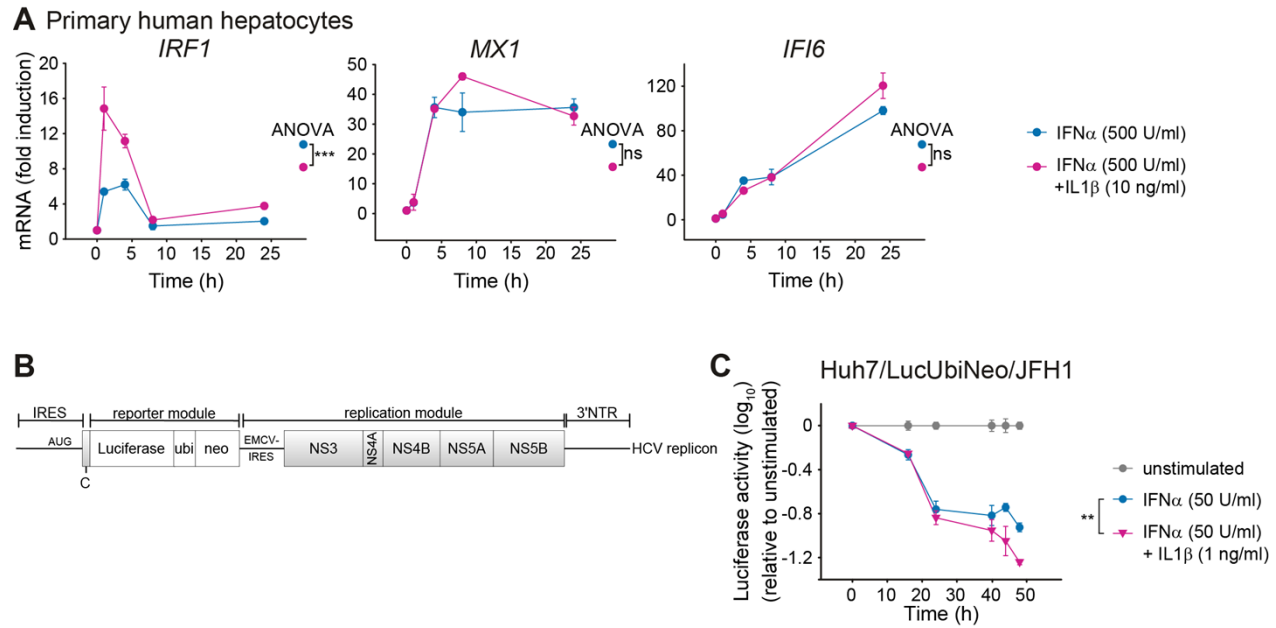

1044

1045 **Fig 7 Co-stimulation with IFN $\alpha$  and IL1 $\beta$  enhances IFN $\alpha$ -induced gene expression**

1046 **in primary human hepatocytes and viral clearance of HCV in a replicon cell line. (A)**

1047 **Effect of co-stimulation with IFN $\alpha$  and IL1 $\beta$  on mRNA expression of IFN $\alpha$ -induced genes**

1048 **in primary human hepatocytes. Cells were stimulated with 500 U/ml IFN $\alpha$  alone or co-**

1049 **treated with 500 U/ml IFN $\alpha$  and 10 ng/ml IL1 $\beta$ . RNA was extracted at the indicated time**

1050 **points and analyzed by qRT-PCR. Samples were analyzed from three different donors**

1051 **and error bars represent SD. (B) Scheme of the bicistronic subgenomic HCV reporter**

1052 **RNA (replicon). IRES, internal ribosomal entry site; NTR, non-translated region. (C)**

1053 **Enhanced suppression of HCV replication in cells co-stimulated with IFN $\alpha$  and IL1 $\beta$ .**

1054 **Huh7/HCV/Luc replicon cells were stimulated with 50 U/ml IFN $\alpha$  alone or were co-treated**

1055 **with 50 U/ml IFN $\alpha$  and 1 ng/ml IL1 $\beta$ . The values are relative to the unstimulated control.**

1056 **Error bars represent the SEM of six technical replicates.**

### A Primary mouse hepatocytes

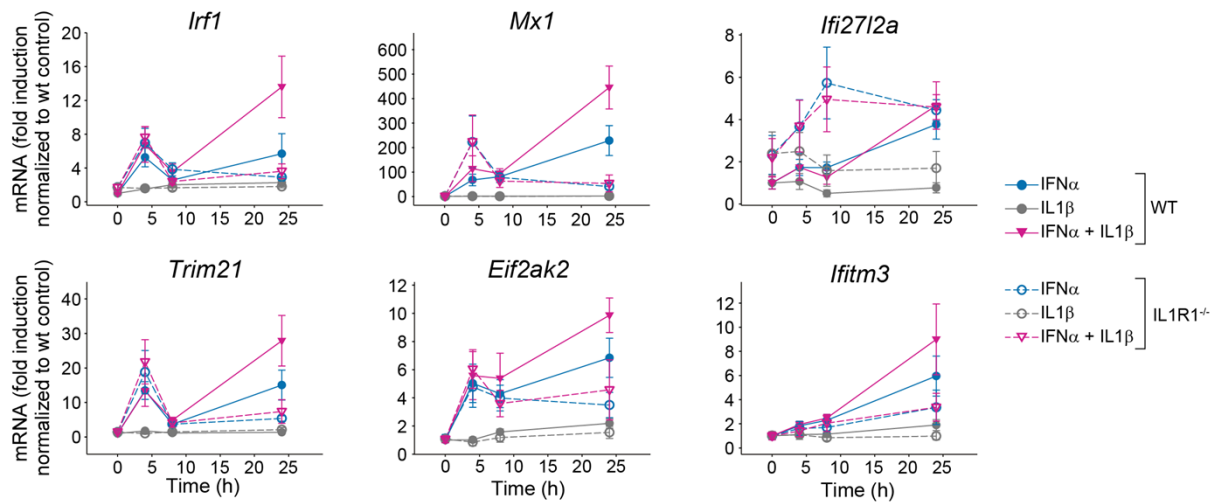

### B Mice infected with LCMV

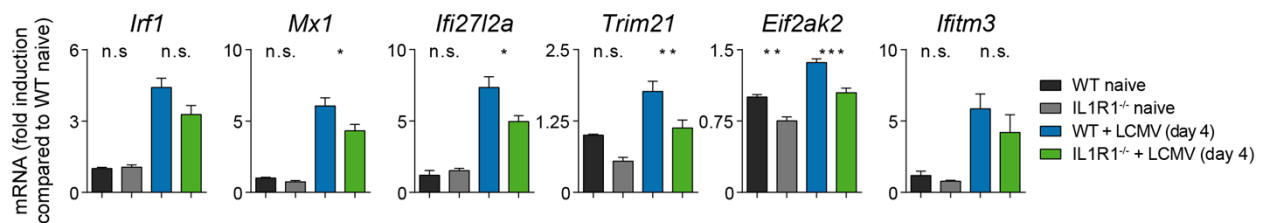

### C

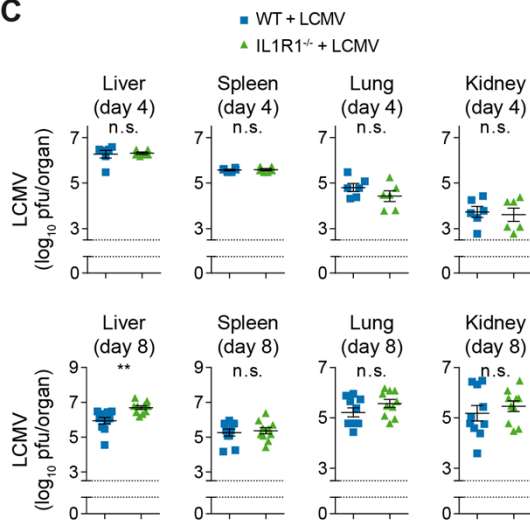

### D

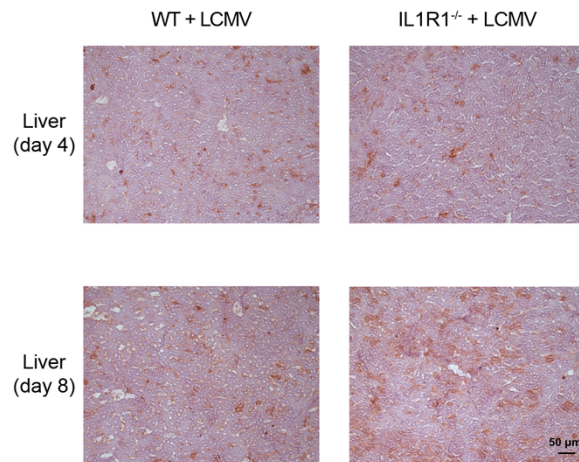

1057

1058 **Fig 8 IFN $\alpha$ -induced antiviral response is reduced and virus replication is enhanced**

1059 **in IL1R1<sup>-/-</sup> mice. (A)** Expression of the selected antiviral genes in primary mouse

1060 hepatocytes from wild-type (WT) or IL1R1 knock-out (IL1R1<sup>-/-</sup>) mice upon stimulation with

1061 500 U/ml murine IFN $\alpha$ 2, 10 ng/ml murine IL1 $\beta$  or co-treatment. RNA was extracted at the  
1062 indicated time points and analyzed by qRT-PCR. Error bars represent SD of four biological  
1063 replicates; a.u.: arbitrary units. **(B)** Wild-type (wt) or IL1R1 knock-out (IL1R1<sup>-/-</sup>) CL57BL/6  
1064 mice were infected with 2 $\times$ 10<sup>6</sup> pfu of LCMV strain WE. Prior to and four days post infection,  
1065 livers were isolated and the selected antiviral genes were measured by qRT-PCR.  
1066 Differences between WT and IL1R1<sup>-/-</sup> livers were tested by one-way analysis of variance.  
1067 \*\*\*, p<0.001; \*\*, p<0.01; \*, p<0.05; n.s., not significant; n=6. **(C)** Wild-type (wt) or IL1R1  
1068 knock-out (IL1R1<sup>-/-</sup>) CL57BL/6 mice were infected with 2 $\cdot$ 10<sup>6</sup> pfu of LCMV WE. Four and  
1069 eight days post infection, livers, spleens, lungs and kidneys were isolated and viral load  
1070 was quantified. Titer differences between WT and IL1R1<sup>-/-</sup> organs were tested by two-  
1071 sided t-tests. \*\*, p<0.01; n.s., not significant; n=6-10. **(D)** Wildtype (wt) or IL1R1 knock-out  
1072 (IL1R1<sup>-/-</sup>) CL57BL/6 mice were infected with 2 $\cdot$ 10<sup>6</sup> pfu of LCMV WE. Four and eight days  
1073 past infection, livers were isolated and viral proteins (LCMV-NP) were stained; n=6-7;  
1074 scale bar=50  $\mu$ m.

1075 **Supporting information captions**

1076 **S1 Fig. Core mathematical model of IFN $\alpha$ -induced JAK/STAT signaling and gene**  
1077 **expression. (A)** Schematic representation of the core model according to Systems  
1078 Biology Graphical Notation. TFBS: transcription factor-binding site. **(B,C)** Trajectories of  
1079 the core model are shown together with the dynamic behavior of the core components of  
1080 the JAK/STAT signaling pathway measured by quantitative immunoblotting **(B)** and to the  
1081 expression of IFN $\alpha$ -induced genes examined by qRT-PCR **(C)** after stimulation of Huh7.5  
1082 cells with 500 U/ml IFN $\alpha$ . Filled circles: experimental data; line: model trajectories, shades:  
1083 estimated error; a.u. arbitrary units.

1084  
1085 **S2 Fig. The core model with an additional intracellular feedback is superior and IRF-**  
1086 **downregulation enhances gene expression. (A)** Model rankings according to likelihood  
1087 ratio test presented by the negative logarithmic likelihood penalized by parameter  
1088 difference. Lower values indicate **(B)** Model rankings according to Akaike information  
1089 criteria (AIC). The preferred model is the one with the smaller AIC value. **(C)** Assessment  
1090 of the optimization performance by a waterfall plot. The best parameters were reproducibly  
1091 found, which validates the applied model calibration approach. **(D)** Huh7.5 cells were  
1092 growth factor depleted and pre-incubated for 24 hours with siRNA directed against *IRF2*,  
1093 *IRF4* or *IRF8* or a combination thereof followed by 500 U/ml IFN $\alpha$  treatment. At indicated  
1094 time points RNA was extracted and analyzed using qRT-PCR. Error bars represent SD  
1095 ( $n=3$ ). **(E)** Huh7.5 cells were growth factor depleted and pre-incubated for 24 hours with  
1096 siRNA directed against *IRF2* followed by 500 U/ml IFN $\alpha$  treatment. At indicated time points  
1097 RNA was extracted and analyzed using qRT-PCR. Error bars represent SD ( $n=3$ ).

1098

1099 **S3 Fig. IFN $\alpha$ -induced gene expression after co-stimulation with IL8 and the**  
1100 **activation of STAT3 by IL1 $\beta$  is blocked by Stattic. (A)** Co-stimulation with IFN $\alpha$  and  
1101 IL8. Huh7.5 cells were growth factor depleted followed by single treatment with 500 U/ml  
1102 IFN $\alpha$  alone or in combination with 10 ng/ml IL8. At indicated time points RNA was  
1103 extracted and analyzed using qRT-PCR. Error bars represent SD of biological triplicates.  
1104 **(B)** Huh7.5 cells were single or co-stimulated with 500 U/ml IFN $\alpha$  and 10 ng/ml IL1 $\beta$ . Cells  
1105 were lysed at indicated time points and analyzed using quantitative immunoblotting. Error  
1106 bars represent SEM of three biological replicates. **(C)** mKate2-Stat3 primary mouse  
1107 hepatocytes were stimulated with 5 ng/ml IL-6 or 10 ng/ml IL-1 $\beta$ . Line plots represent the  
1108 dynamics of nuclear STAT3 for the indicated conditions. Two biological replicates and two  
1109 technical replicates were included. Data represent mean  $\pm$  SEM. **(D)** Huh7.5 cells were  
1110 treated with 10  $\mu$ M Stattic for up to 24 h or left untreated and cell viability was measured.  
1111 **(E)** Huh7.5 cells were pre-treated with 10  $\mu$ M Stattic followed by 10 ng/ml IL1 $\beta$  and 500  
1112 U/ml IFN $\alpha$  treatment. Cells were lysed at indicated time points and analyzed using  
1113 quantitative immunoblotting. Error bars represent SD of biological triplicates. a.u.: arbitrary  
1114 units.

1115  
1116 **S4 Fig. Enhanced viral clearance in a HCV replicon cell line upon co-stimulation**  
1117 **with IFN $\alpha$  and IL1 $\beta$ . (A)** Luciferase activity measurement in single and co-stimulated  
1118 cells. Time-resolved measurements of luciferase activity in cells treated with 500 U/ml  
1119 IFN $\alpha$  alone or in combination with 10 ng/ml IL1 $\beta$  compared to the unstimulated control.  
1120 Error bars represent SEM of three biological replicates. **(B)** Luciferase activity  
1121 measurement in single and co-stimulated cells. Time-resolved measurements of  
1122 luciferase activity in cells treated with 50 U/ml IFN $\alpha$  alone or pre-treatment with 50 U/ml

1123 IFN $\alpha$  followed by 1 ng/ml IL1 $\beta$  treatment compared to the unstimulated control. Error bars  
1124 represent SEM of four biological replicates.

1125  
1126 **S5 Fig. Reduction of anti-viral T cell immunity following LCMV infection in IL1R1<sup>-/-</sup>**  
1127 **mice. (A)** Wild-type (WT) or IL1R1 knock-out (IL1R1<sup>-/-</sup>) CL57BL/6 mice were infected with  
1128 2 $\times$ 10<sup>6</sup> pfu of LCMV WE. Four and eight days post infection, single cell suspensions from  
1129 spleen and liver tissue as well as peripheral blood lymphocytes were stained using gp33  
1130 or np396 MHC class I tetramers or gp61 MHC II tetramer followed by staining with anti-  
1131 CD8. Differences between WT and IL1R1<sup>-/-</sup> cells were tested by two-way ANOVA. \*\*\*,  
1132 p<0.001; \*\*, p<0.01; \*, p<0.05; n.s., not significant, n=6. **(B)** Four and eight days post  
1133 infection, suspended liver cells or splenocytes were stained with the LCMV-specific  
1134 peptides gp33, np396, or gp61. Additionally, surface staining with anti-CD8 or anti-CD4  
1135 antibodies and intracellular staining with anti-IFN $\gamma$  antibodies was performed. Differences  
1136 between WT and IL1R1<sup>-/-</sup> cells were tested by two-way ANOVA. \*, p<0.05; n.s., not  
1137 significant, n=6. **(C)** Four and eight days post infection, lymphocytes were stained with  
1138 antibodies against surface molecules.

1139  
1140 **S1 Table. Initial concentrations of model species.** Measured concentrations (JAK1,  
1141 TYK2, STAT1, STAT2, IRF9) were transformed from molecules per cell to nM by using  
1142 STAT1 concentration as reference. Concentrations for receptors were assumed to be  
1143 non-limiting and therefore set to a high amount [4].

1144  
1145 **S2 Table. qRT-PCR primers and corresponding UPL probes.**
